# Supplementary material for: An exploration of Prevotella-rich microbiomes in HIV and men who have sex with men
Source: PubMed Central journal article supplement (PMC6219090; doi:10.1186/s40168-018-0580-7), 2018-11-05
Supplement: 40168_2018_580_MOESM20_ESM.pdf [file 40168_2018_580_MOESM20_ESM.pdf]

# An exploration of Prevotella-rich microbiomes in HIV and men who have sex with men

*Abigail JS Armstrong*

*6/12/2018*

*All QIIME analysis was performed using QIIME1.9.1*

## Sequencing Processing Overview

### Quality filtering

6 MiSeq runs were demultiplexed separately in QIIME without any quality filtering. The resulting fastq files were run through DADA2 in R using inhouse code found at: [github.com/shafferm/dada2\\_qiime1](https://github.com/shafferm/dada2_qiime1) All run reads were trimmed at 112 basepairs during DADA2 processing

### OTU Picking

99% OTUs were picked on the DADA2 processed data using a combination of QIIME pipeline and inhouse scripts

Closed reference OTUs (sortmerna)

```
pick_otus.py -i ~/Data/HIV_6runs/OTUs/dada2_output/HIV_6_runs.fasta -C -m sortmerna
-s .99 --threads 3 -r ~/Desktop/blast_dbs/gg_13_8_otus/rep_set/99_otus.fasta
-o ~/Data/HIV_6runs/OTUs/99_otus/sortmerna_picked_otus/
```

```
filter_fasta.py -f ~/Data/HIV_6runs/OTUs/dada2_output/HIV_6_runs.fasta
-s ~/Data/HIV_6runs/OTUs/99_otus/sortmerna_picked_otus/HIV_6_runs_failures.txt
-o ~/Data/HIV_6runs/OTUs/99_otus/sortmerna_picked_otus/failures.fasta
```

```
pick_rep_set.py -i ~/Data/HIV_6runs/OTUs/99_otus/sortmerna_picked_otus/HIV_6_runs_otus.txt
-o ~/Data/HIV_6runs/OTUs/99_otus/sortmerna_picked_otus/rep_set.fna
-f ~/Data/HIV_6runs/OTUs/dada2_output/HIV_6_runs.fasta
```

Open reference OTUs (UCLUST)

```
pick_otus.py -i ~/Data/HIV_6runs/OTUs/99_otus/sortmerna_picked_otus/failures.fasta
-o ~/Data/HIV_6runs/OTUs/99_otus/open_ref_uclust/ -m uclust
```

```
pick_rep_set.py -i ~/Data/HIV_6runs/OTUs/99_otus/open_ref_uclust/failures_otus.txt
-o ~/Data/HIV_6runs/OTUs/99_otus/open_ref_uclust/failure_rep_set.fna
-f ~/Data/HIV_6runs/OTUs/99_otus/sortmerna_picked_otus/failures.fasta
```

Concatenating open and closed reference OTUs

```
cat ~/Data/HIV_6runs/OTUs/99_otus/sortmerna_picked_otus/rep_set.fna
~/Data/HIV_6runs/OTUs/99_otus/open_ref_uclust/failure_rep_set.fna >
~/Data/HIV_6runs/OTUs/99_otus/rep_set.fna
```

```
cat ~/Data/HIV_6runs/OTUs/99_otus/open_ref_uclust/failure_rep_set.fna >
```

```
~/Data/HIV_6runs/OTUs/99_otus/new_refseqs.fna
```

```
cat ~/Data/HIV_6runs/OTUs/99_otus/sortmerna_picked_otus/HIV_6_runs_otus.txt  
~/Data/HIV_6runs/OTUs/99_otus/open_ref_uclust/failures_otus.txt >  
~/Data/HIV_6runs/OTUs/99_otus/final_otu_map.txt
```

Creating an OTU table *code written by M. Shaffer*

```
from biom import load_table  
from biom.table import Table  
import numpy as np  
  
otu_map = open("~/Data/HIV_6runs/OTUs/99_otus/final_otu_map.txt", 'U')  
otu_map = otu_map.readlines()  
otu_map = [i.strip().split() for i in otu_map]  
otu_map = {i[0]: i[1:] for i in otu_map}  
  
table = load_table("~/Data/HIV_6runs/OTUs/dada2_output/HIV_6_runs.biom")  
new_table = np.zeros((len(otu_map), table.shape[1]))  
for i, otu in enumerate(otu_map):  
    for seq in otu_map[otu]:  
        new_table[i,]+=table.data(seq, axis="observation")  
new_table = Table(new_table, otu_map.keys(), table.ids())  
new_table.to_json("dada2_to_otu_table",  
    open("~/Data/HIV_6runs/OTUs/99_otus/otu_table.biom", 'w'))
```

Adding taxonomy

```
assign_taxonomy.py -o ~/Data/HIV_6runs/OTUs/99_otus/taxonomy/  
-i ~/Data/HIV_6runs/OTUs/99_otus/rep_set.fna  
-r ~/Desktop/blast_dbs/gg_13_8_otus/rep_set/99_otus.fasta  
-t ~/Desktop/blast_dbs/gg_13_8_otus/taxonomy/99_otu_taxonomy.txt  
  
biom add-metadata -i ~/Data/HIV_6runs/OTUs/99_otus/otu_table.biom  
--observation-metadata-fp  
~/Data/HIV_6runs/OTUs/99_otus/taxonomy/rep_set_tax_assignments.txt  
-o ~/Data/HIV_6runs/OTUs/99_otus/otu_table_w_tax.biom --sc-separated taxonomy  
--observation-header OTUID,taxonomy
```

Pynast alignment

```
align_seqs.py -i ~/Data/HIV_6runs/OTUs/99_otus/rep_set.fna  
-o ~/Data/HIV_6runs/OTUs/99_otus/pynast_aligned_seqs/  
  
filter_alignment.py -o ~/Data/HIV_6runs/OTUs/99_otus/pynast_aligned_seqs/  
-i ~/Data/HIV_6runs/OTUs/99_otus/pynast_aligned_seqs/rep_set_aligned.fasta  
  
make_phylogeny.py -i  
~/Data/HIV_6runs/OTUs/99_otus/pynast_aligned_seqs/rep_set_aligned_pfiltered.fasta  
-o ~/Data/HIV_6runs/OTUs/99_otus/rep_set.tree
```

Filtering pynast failures Code written by M. Shaffer

```
p = open("~/Data/HIV_6runs/OTUs/99_otus/pynast_aligned_seqs/failures.fasta")  
f = p.readlines()  
headers = [f[i].strip() for i in xrange(len(f)) if i%2==0]
```

```
ids_to_toss = [i[1:] for i in headers]

table = load_table("~/Data/HIV_6runs/OTUs/99_otus/otu_table.biom")
set_to_toss = set(table.ids(axis="observation")) & set(ids_to_toss)

table.filter(set_to_toss, invert=True, axis="observation")
table.to_json("remove_pynast_failures.py",
             open("~/Data/HIV_6runs/OTUs/99_otus/otu_table_no_pynase_failures.biom", 'w'))
```

## Cohort Description

*There were significantly higher CD4+ T cell numbers (cells/uL) in HIV-positive MSM on ART compared to the ART-naïve cohorts but no significant difference between ART-treated and ART-naïve HIV-positive women*

```
library("ggplot2")
md <- read.table("~/Data/HIV_6runs/metadata/_R_metadata_one_rep_8-23.txt",
                header = TRUE, sep = "\t", strip.white = TRUE)
md.HIV <- subset(md, HIV == "Positive")
md.HIV.women <- subset(md.HIV, gender == "Female")
md.HIV.men <- subset(md.HIV, gender == "Male")
md.men <- subset(md, gender == "Male")
md.neg <- subset(md, HIV == "Negative")
```

CD4 and viral load stats HIV positive treated compared to untreated cohorts

```
kruskal.test(treatment ~ cd4_value, data = md.HIV)

##
## Kruskal-Wallis rank sum test
##
## data: treatment by cd4_value
## Kruskal-Wallis chi-squared = 106.88, df = 106, p-value = 0.4579

kruskal.test(treatment ~ viral_load_value, data = md.HIV)
```

```
##
## Kruskal-Wallis rank sum test
##
## data: treatment by viral_load_value
## Kruskal-Wallis chi-squared = 111, df = 57, p-value = 2.454e-05
```

HIV positive WOMEN treated compared to untreated cohorts

```
kruskal.test(treatment ~ cd4_value, data = md.HIV.women)

##
## Kruskal-Wallis rank sum test
##
## data: treatment by cd4_value
## Kruskal-Wallis chi-squared = 18, df = 18, p-value = 0.4557

kruskal.test(treatment ~ viral_load_value, data = md.HIV.women)
```

```
##
## Kruskal-Wallis rank sum test
##
```

```
## data: treatment by viral_load_value
## Kruskal-Wallis chi-squared = 18, df = 8, p-value = 0.02123
```

HIV positive MEN treated compared to untreated cohorts

```
kruskal.test(treatment ~ cd4_value, data = md.HIV.men)
```

```
##
## Kruskal-Wallis rank sum test
##
```

```
## data: treatment by cd4_value
## Kruskal-Wallis chi-squared = 92, df = 90, p-value = 0.4217
```

```
kruskal.test(treatment ~ viral_load_value, data = md.HIV.men)
```

```
##
## Kruskal-Wallis rank sum test
##
```

```
## data: treatment by viral_load_value
## Kruskal-Wallis chi-squared = 92, df = 51, p-value = 0.0003816
```

HIV Positive treated and untreated subjects comparing men and women

```
kruskal.test(gender ~ viral_load_value, data = md.HIV)
```

```
##
## Kruskal-Wallis rank sum test
##
```

```
## data: gender by viral_load_value
## Kruskal-Wallis chi-squared = 46.357, df = 57, p-value = 0.8421
```

```
kruskal.test(gender ~ cd4_value, data = md.HIV)
```

```
##
## Kruskal-Wallis rank sum test
##
```

```
## data: gender by cd4_value
## Kruskal-Wallis chi-squared = 100.45, df = 106, p-value = 0.6339
```

**CD4 count and Viral Load oh HIV positive subjects broken up by gender and treatment**

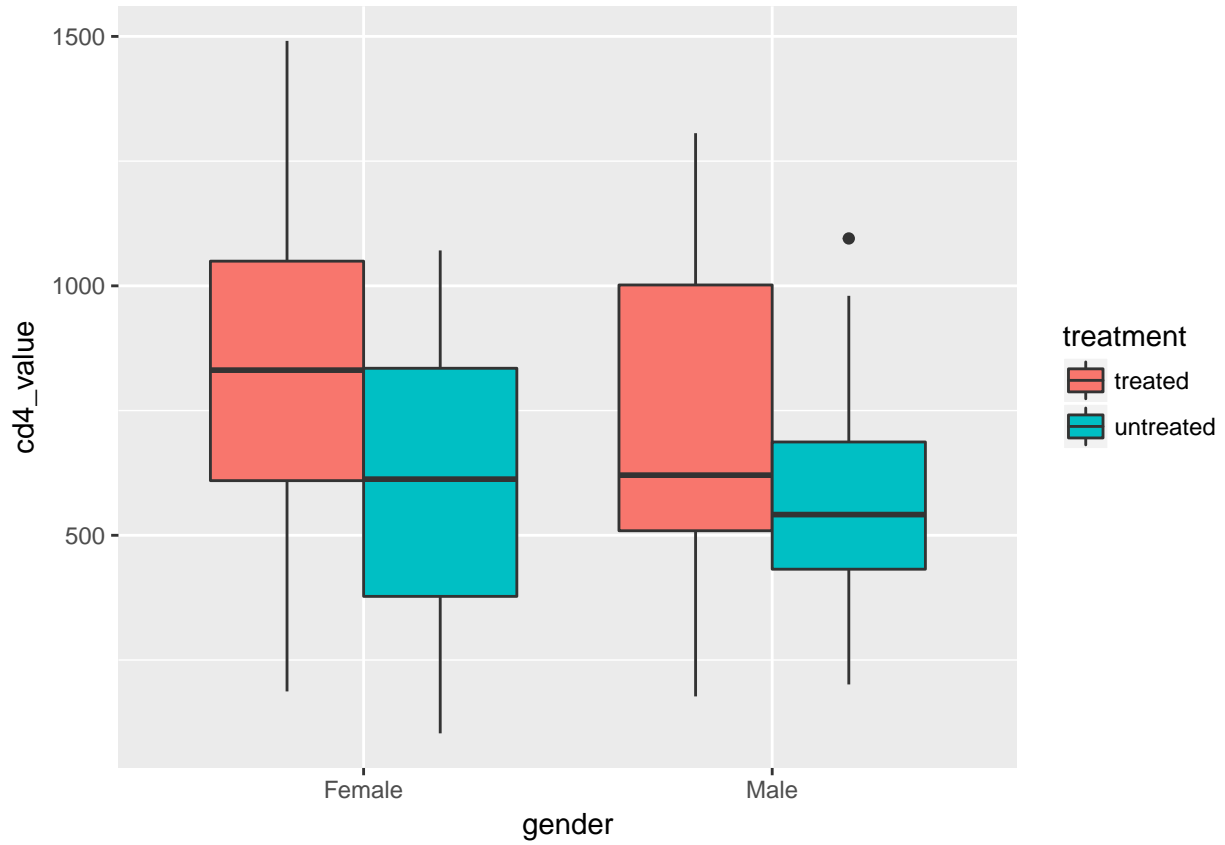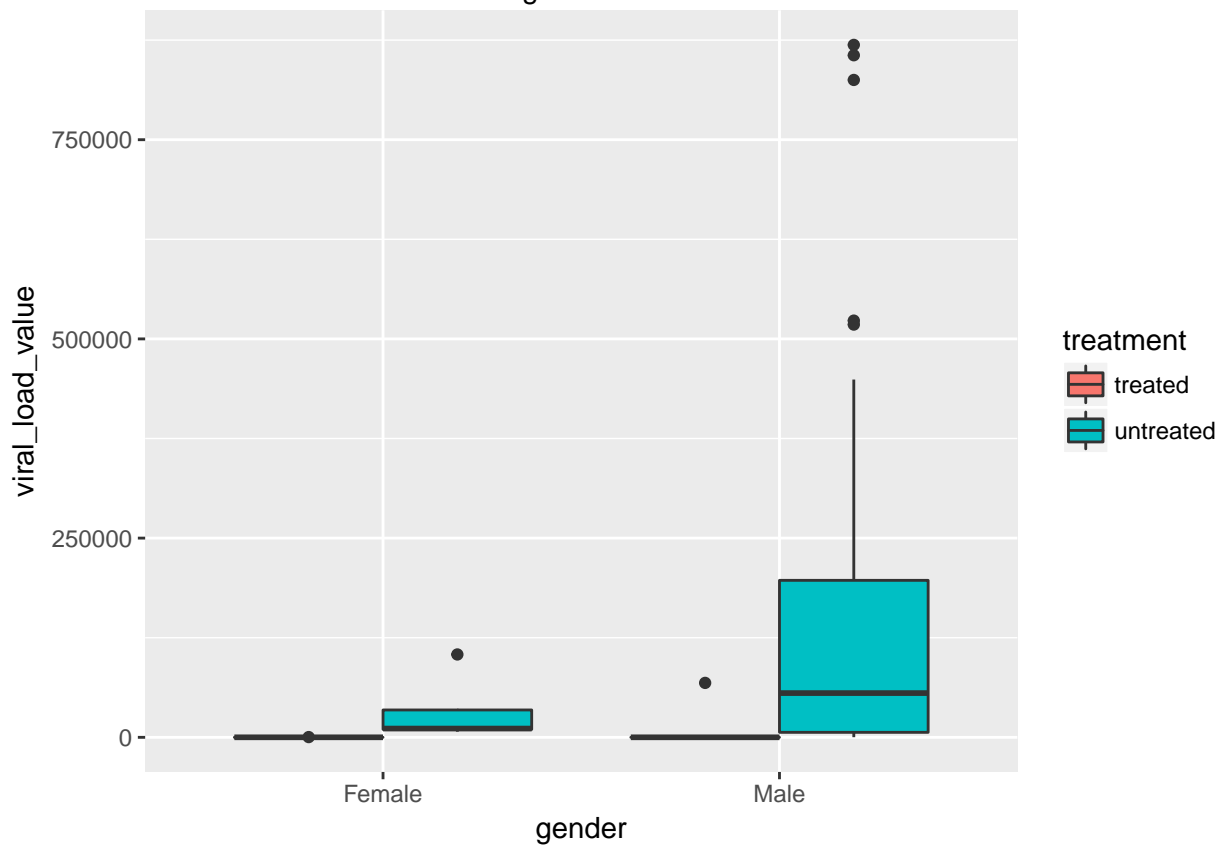

# Sexual behavior is the strongest descriptor of compositional variation in the gut microbiome

## Enterotyping

*MSM were more likely to be in a Prevotella enterotype, as defined using partition around medoids (PAM) clustering*

Code modified from <http://enterotype.embl.de/enterotypes.html>

```
data = read.table("~/Data/HIV_6runs/core_div/one_rep/table_even11218_L6_enterotype.txt",
  header = T, row.names = 1, dec = ".", sep = "\t")
data = data[-1, ]
```

### Calculating Distance

```
JSD <- function(x, y) sqrt(0.5 * KLD(x, (x + y)/2) + 0.5 * KLD(y,
  (x + y)/2))
KLD <- function(x, y) sum(x * log(x/y))

dist.JSD <- function(inMatrix, pseudocount = 1e-06, ...) {
  KLD <- function(x, y) sum(x * log(x/y))
  JSD <- function(x, y) sqrt(0.5 * KLD(x, (x + y)/2) + 0.5 *
    KLD(y, (x + y)/2))
  matrixColSize <- length(colnames(inMatrix))
  matrixRowSize <- length(rownames(inMatrix))
  colnames <- colnames(inMatrix)
  resultsMatrix <- matrix(0, matrixColSize, matrixColSize)

  inMatrix = apply(inMatrix, 1:2, function(x) ifelse(x == 0,
    pseudocount, x))

  for (i in 1:matrixColSize) {
    for (j in 1:matrixColSize) {
      resultsMatrix[i, j] = JSD(as.vector(inMatrix[, i]),
        as.vector(inMatrix[, j]))
    }
  }
  rownames(resultsMatrix) <- colnames(resultsMatrix) <- colnames
  resultsMatrix <- as.dist(resultsMatrix)
  attr(resultsMatrix, "method") <- "dist"
  return(resultsMatrix)
}

data.dist = dist.JSD(data)
```

### Defining clusters

```
k = 2
library(cluster)

# x is a distance matrix and k the number of clusters
pam.clustering = function(x, k) {
  require(cluster)
  cluster = as.vector(pam(as.dist(x), k, diss = TRUE)$clustering)
  return(cluster)
}
```

```

}

data.cluster = pam.clustering(data.dist, k = k)

```

Determining optimal number of clusters

```

require(clusterSim)

## Loading required package: clusterSim
## Loading required package: MASS
##
## This is package 'modeest' written by P. PONCET.
## For a complete list of functions, use 'library(help = "modeest")' or 'help.start()'.
nclusters = index.G1(t(data), data.cluster, d = data.dist, centrotypes = "medoids")

nclusters = NULL

for (k.iter in 1:20) {
  if (k.iter == 1) {
    nclusters[k.iter] = NA
  } else {
    data.cluster.temp = pam.clustering(data.dist, k.iter)
    nclusters[k.iter] = index.G1(t(data), data.cluster.temp,
      d = data.dist, centrotypes = "medoids")
  }
}

plot(nclusters, type = "h", xlab = "k clusters", ylab = "CH index")

```

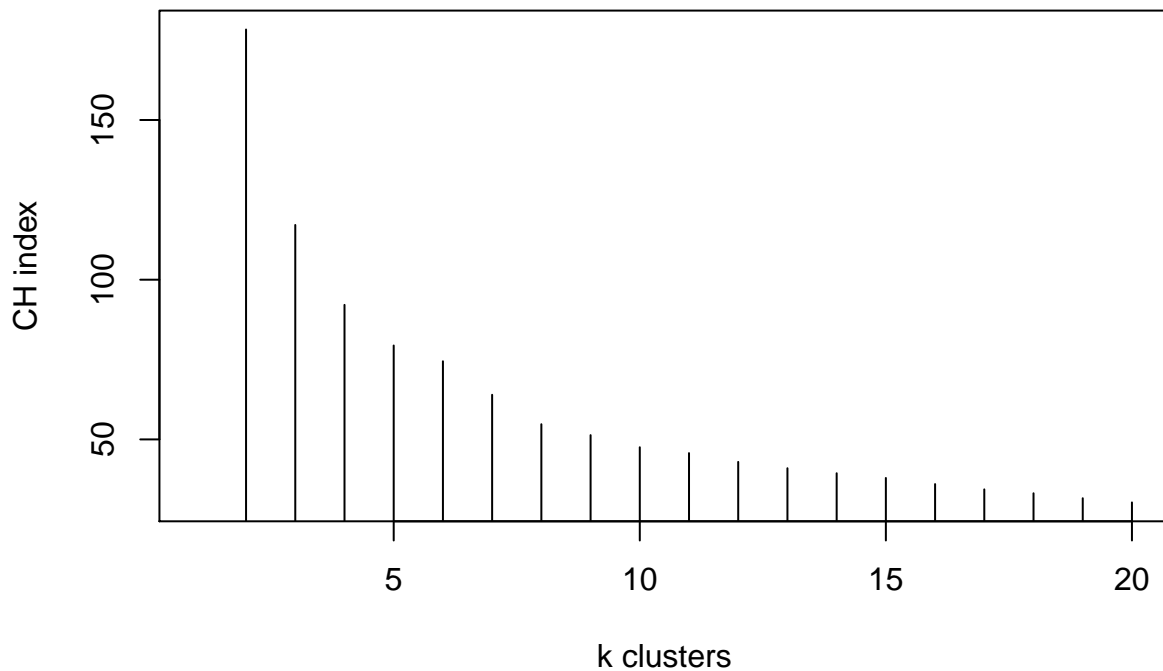

```

obs.silhouette = mean(silhouette(data.cluster, data.dist)[, 3])

```

Noise Removal

```
noise.removal <- function(dataframe, percent = 0.01, top = NULL) {
  Matrix <- dataframe
  bigones <- rowSums(Matrix) * 100/(sum(rowSums(Matrix))) >
    percent
  Matrix_1 <- Matrix[bigones, ]
  print(percent)
  return(Matrix_1)
}
data.denoized = noise.removal(data, percent = 0.01)
```

```
## [1] 0.01
```

Between Class Analysis

```
library(ade4)
obs.pca = dudi.pca(data.frame(t(data)), scannf = F, nf = 10)
obs.bet = bca(obs.pca, fac = as.factor(data.cluster), scannf = F,
  nf = k - 1)
s.class(obs.bet$ls, fac = as.factor(data.cluster), grid = F)
s.class(obs.bet$ls, fac = as.factor(data.cluster), grid = F,
  cell = 0, cstar = 0, col = c(4, 2, 3))
```

PCoA Analysis

```
obs.pcoa = dudi.pco(data.dist, scannf = F, nf = 3)
s.class(obs.pcoa$li, fac = as.factor(data.cluster), grid = F)
s.class(obs.pcoa$li, fac = as.factor(data.cluster), grid = F,
  cell = 0, cstar = 0, col = c(3, 2, 4))
```

## Enterotyping statistics

Fishers test independence of orientation and enterotype

```
library(rcompanion)
enterotype.tbl <- table(md$MSM, md$Enterotype)
pairwiseNominalIndependence(as.matrix(enterotype.tbl), fisher = TRUE,
  gtest = FALSE, chisq = FALSE, digits = 3)
```

```
##      Comparison p.Fisher p.adj.Fisher
## 1 Female : MSM 3.86e-19      1.16e-18
## 2 Female : MSW 3.72e-02      3.72e-02
## 3      MSM : MSW 3.05e-07      4.57e-07
```

## Adonis test of the weighted and unweighted unfrac

*Applying the Adonis test showed significant effects for MSM and HIV with weighted Unifrac, which explained 16.4% and 1.4% of the variation respectively, and for MSM, HIV, and ART with unweighted Unifrac, which explained 7.0%, 0.9%, 0.7% respectively files/packages*

```
library(vegan)
```

```
## Loading required package: permute
## Loading required package: lattice
## This is vegan 2.4-4
```



```

dist.file.wu <- "~/Data/HIV_6runs/core_div/one_rep/bdiv_even11218/weighted_unifrac_dm.txt"
dist.matrix.wu <- as.matrix(read.table(dist.file.wu, sep = "\t",
  header = T, row.names = 1, check = FALSE, quote = "\""))

dist.file.uwu <- "~/Data/HIV_6runs/core_div/one_rep/bdiv_even11218/unweighted_unifrac_dm.txt"
dist.matrix.uwu <- as.matrix(read.table(dist.file.uwu, sep = "\t",
  header = T, row.names = 1, check = FALSE, quote = "\""))

```

Running adonis test - running 10000 permutations resulted in the most consistent results. However results may vary slightly from published runs of permuted adonis.

```

adonis(as.dist(dist.matrix.wu) ~ MSM + HIV + treatment, data = md,
  permutations = 10000)

```

```

##
## Call:
## adonis(formula = as.dist(dist.matrix.wu) ~ MSM + HIV + treatment,      data = md, permutations = 10000)
##
## Permutation: free
## Number of permutations: 10000
##
## Terms added sequentially (first to last)
##
##              Df SumsOfSqs MeanSqs F.Model      R2    Pr(>F)
## MSM           2    2.4578 1.22890 21.2134 0.16374 9.999e-05 ***
## HIV           1    0.2042 0.20421  3.5251 0.01360  0.0105 *
## treatment     1    0.0672 0.06720  1.1600 0.00448  0.2705
## Residuals    212   12.2813 0.05793           0.81818
## Total        216   15.0105           1.00000
## ---
## Signif. codes:  0 '***' 0.001 '**' 0.01 '*' 0.05 '.' 0.1 ' ' 1

```

```

adonis(as.dist(dist.matrix.uwu) ~ MSM + HIV + treatment, data = md,
  permutations = 10000)

```

```

##
## Call:
## adonis(formula = as.dist(dist.matrix.uwu) ~ MSM + HIV + treatment,      data = md, permutations = 10000)
##
## Permutation: free
## Number of permutations: 10000
##
## Terms added sequentially (first to last)
##
##              Df SumsOfSqs MeanSqs F.Model      R2    Pr(>F)
## MSM           2    2.746 1.37291  8.1973 0.07064 9.999e-05 ***
## HIV           1    0.338 0.33814  2.0189 0.00870 0.005399 **
## treatment     1    0.278 0.27842  1.6624 0.00716 0.021398 *
## Residuals    212   35.507 0.16748           0.91349
## Total        216   38.869           1.00000
## ---
## Signif. codes:  0 '***' 0.001 '**' 0.01 '*' 0.05 '.' 0.1 ' ' 1

```

## Comparison of MSM and non-MSM

*HIV-negative and HIV-positive MSM had significantly greater Phylogenetic Diversity (PD; (30)) and observed Operational Taxonomic Units (OTUs, defined at a 99%) compared to non-MSM and many significantly different OTUs and genera.*

Alpha diversity statistics

Data

```
alpha.div <- read.table("~/Data/HIV_6runs/stats/alpha_div/alpha_div.txt",
  header = TRUE, sep = "\t", strip.white = TRUE)
alpha.div.HIV.pos <- subset(alpha.div, HIV == "Positive")
alpha.div.HIV.neg <- subset(alpha.div, HIV == "Negative")
```

Stats on HIV Positive Subjects

```
kruskal.test(PD_whole_tree ~ MSM, data = alpha.div.HIV.pos)
```

```
##
## Kruskal-Wallis rank sum test
##
## data: PD_whole_tree by MSM
## Kruskal-Wallis chi-squared = 9.64, df = 2, p-value = 0.008067
```

```
kruskal.test(observed_otus ~ MSM, data = alpha.div.HIV.pos)
```

```
##
## Kruskal-Wallis rank sum test
##
## data: observed_otus by MSM
## Kruskal-Wallis chi-squared = 9.5712, df = 2, p-value = 0.008349
```

```
kruskal.test(shannon ~ MSM, data = alpha.div.HIV.pos)
```

```
##
## Kruskal-Wallis rank sum test
##
## data: shannon by MSM
## Kruskal-Wallis chi-squared = 10.423, df = 2, p-value = 0.005454
```

Stats on HIV Negative Subjects

```
kruskal.test(PD_whole_tree ~ MSM, data = alpha.div.HIV.neg)
```

```
##
## Kruskal-Wallis rank sum test
##
## data: PD_whole_tree by MSM
## Kruskal-Wallis chi-squared = 3.4326, df = 2, p-value = 0.1797
```

```
kruskal.test(observed_otus ~ MSM, data = alpha.div.HIV.neg)
```

```
##
## Kruskal-Wallis rank sum test
##
## data: observed_otus by MSM
## Kruskal-Wallis chi-squared = 3.4775, df = 2, p-value = 0.1757
```

```
kruskal.test(shannon ~ MSM, data = alpa.div.HIV.neg)
```

```
##  
## Kruskal-Wallis rank sum test  
##  
## data: shannon by MSM  
## Kruskal-Wallis chi-squared = 0.43477, df = 2, p-value = 0.8046  
OTU difference statistics were calculated in QIIME 1.9.1  
OTU table was filtered for only OTUs present in at least 20% of the samples
```

```
filter_otus_from_otu_table.py  
-i ~/Data/HIV_6runs/stats/MSM_comp/otu_table_neg_RA.biom  
-o ~/Data/HIV_6runs/stats/MSM_comp/otu_table_neg_RA_filt20.biom  
-s 13
```

```
group_significance.py  
-i ~/Data/HIV_6runs/stats/MSM_comp/otu_table_neg_RA_filt20.biom  
-o ~/Data/HIV_6runs/stats/MSM_comp/kw_otus.txt  
-m ~/Data/HIV_6runs/metadata/_metadata_one_rep_6_30.txt  
-c MSMyn
```

## Prevotella-rich microbiomes differ in MSM compared to non-MSM

*We found that the proportion of Prevotella-rich individuals who did not fit within the Prevotella reference space was significantly higher for MSM (81.4% of individuals) than non-MSM (46.7%)* Enterotyping fit was performed using the tools outlined at enterotypes.org

```
md.prev <- subset(md, Enterotype == "Prevotella")  
prev.ent.fit.tbl <- table(md.prev$MSMyn, md.prev$Within_ET_space)  
pairwiseNominalIndependence(as.matrix(prev.ent.fit.tbl), fisher = TRUE,  
  gtest = FALSE, chisq = FALSE, digits = 3)
```

```
## Comparison p.Fisher p.adj.Fisher  
## 1 No : Yes 0.00641 0.00641
```

*Prevotella-rich, HIV-negative MSM (n=25) and non-MSM (n=9) had significantly different relative abundances of 39 OTUs in 21 different genera* OTU difference statistics were calculated in QIIME 1.9.1

OTU table was filtered for only OTUs present in at least 20% of the samples

```
filter_otus_from_otu_table.py  
-i ~/Data/HIV_6runs/stats/HIV_neg/otu_table_neg_RA.biom  
-o ~/Data/HIV_6runs/stats/HIV_neg/otu_table_neg_RA_filt20.biom  
-s 13
```

```
group_significance.py  
-i ~/Data/HIV_6runs/stats/HIV_neg/otu_table_neg_RA_filt20.biom  
-o ~/Data/HIV_6runs/stats/HIV_neg/kw_otus.txt  
-m ~/Data/HIV_6runs/metadata/_metadata_one_rep_6_30.txt  
-c MSMyn
```

# Potential drivers of a Prevotella-enterotype in MSM

## Receptive Anal intercourse

### Taxonomy test performed in QIIME 1.9.1

We did not find any significant association with microbiome taxonomy or alpha or beta diversity between MSM who engaged in RAI ( $n = 31$ ) and those who did not ( $n = 16$ ) when controlling for sexual orientation and HIV status (taxonomy and alpha diversity – Kruskal-Wallis test; beta diversity – adonis test). HIV negative MSM

```
group_significance.py
-i ~/Data/HIV_6runs/stats/HIV_neg_MSM/otu_table_neg_RA_filt20.biom
-o ~/Data/HIV_6runs/stats/HIV_neg_MSM/kw_otus.txt
-m ~/Data/HIV_6runs/metadata/_metadata_one_rep_6_30.txt
-c RAI
```

### HIV positive MSM

```
group_significance.py
-i ~/Data/HIV_6runs/stats/HIV_pos_MSM/otu_table_neg_RA_filt20.biom
-o ~/Data/HIV_6runs/stats/HIV_pos_MSM/kw_otus.txt
-m ~/Data/HIV_6runs/metadata/_metadata_one_rep_6_30.txt
-c RAI
```

### All MSM

```
group_significance.py
-i ~/Data/HIV_6runs/stats/all_MSM/otu_table_neg_RA_filt20.biom
-o ~/Data/HIV_6runs/stats/all_MSM/kw_otus.txt
-m ~/Data/HIV_6runs/metadata/_metadata_one_rep_6_30.txt
-c RAI
```

## Alpha diversity

### Files

```
inf.MSM <- "~/Data/HIV_6runs/stats/MSM_only/alpha_div.txt"
df.MSM <- read.table(inf.MSM, header = TRUE, sep = "\t", strip.white = TRUE)

df.MSM.pos <- subset(df.MSM, HIV == "Positive")
df.MSM.neg <- subset(df.MSM, HIV == "Negative")
```

### HIV negative MSM

```
kruskal.test(observed_otus ~ RAI_frequency, data = df.MSM.neg)
```

```
##
## Kruskal-Wallis rank sum test
##
## data:  observed_otus by RAI_frequency
## Kruskal-Wallis chi-squared = 0.079684, df = 2, p-value = 0.9609
```

```
kruskal.test(shannon ~ RAI_frequency, data = df.MSM.neg)
```

```
##
## Kruskal-Wallis rank sum test
##
## data:  shannon by RAI_frequency
```

```
## Kruskal-Wallis chi-squared = 0.26563, df = 2, p-value = 0.8756
```

HIV positive MSM

```
kruskal.test(observed_otus ~ RAI_frequency, data = df.MSM.pos)
```

```
##
```

```
## Kruskal-Wallis rank sum test
```

```
##
```

```
## data: observed_otus by RAI_frequency
```

```
## Kruskal-Wallis chi-squared = 0.48558, df = 2, p-value = 0.7844
```

```
kruskal.test(shannon ~ RAI_frequency, data = df.MSM.pos)
```

```
##
```

```
## Kruskal-Wallis rank sum test
```

```
##
```

```
## data: shannon by RAI_frequency
```

```
## Kruskal-Wallis chi-squared = 0.78811, df = 2, p-value = 0.6743
```

All MSM

```
kruskal.test(observed_otus ~ RAI_frequency, data = df.MSM)
```

```
##
```

```
## Kruskal-Wallis rank sum test
```

```
##
```

```
## data: observed_otus by RAI_frequency
```

```
## Kruskal-Wallis chi-squared = 0.090442, df = 2, p-value = 0.9558
```

```
kruskal.test(shannon ~ RAI_frequency, data = df.MSM)
```

```
##
```

```
## Kruskal-Wallis rank sum test
```

```
##
```

```
## data: shannon by RAI_frequency
```

```
## Kruskal-Wallis chi-squared = 0.19657, df = 2, p-value = 0.9064
```

## Beta diversity

HIV negative MSM

Weighted

```
dist.file.wu.MSM.neg <- "~/Data/HIV_6runs/stats/MSM_only/beta_div/weighted_unifrac_MSM_negative.txt"
```

```
dist.matrix.wu.MSM.neg <- as.matrix(read.table(dist.file.wu.MSM.neg,  
  sep = "\t", header = T, row.names = 1, check = FALSE, quote = "\""))
```

```
adonis(as.dist(dist.matrix.wu.MSM.neg) ~ RAI_frequency, data = df.MSM.neg,  
  permutations = 10000)
```

Unweighted

```
dist.file.uwu.MSM.neg <- "~/Data/HIV_6runs/stats/MSM_only/beta_div/unweighted_unifrac_MSM_negative.txt"
```

```
dist.matrix.uwu.MSM.neg <- as.matrix(read.table(dist.file.uwu.MSM.neg,  
  sep = "\t", header = T, row.names = 1, check = FALSE, quote = "\""))
```

```
adonis(as.dist(dist.matrix.uwu.MSM.neg) ~ RAI_frequency, data = df.MSM.neg,  
  permutations = 10000)
```

HIV positive MSM

Weighted

```
dist.file.wu.MSM.pos <- "~/Data/HIV_6runs/stats/MSM_only/beta_div/weighted_unifrac_MSM_positive.txt"
dist.matrix.wu.MSM.pos <- as.matrix(read.table(dist.file.wu.MSM.pos,
  sep = "\t", header = T, row.names = 1, check = FALSE, quote = "\""))

adonis(as.dist(dist.matrix.wu.MSM.pos) ~ RAI_frequency, data = df.MSM.pos,
  permutations = 10000)
```

Unweighted

```
dist.file.uwu.MSM.pos <- "~/Data/HIV_6runs/stats/MSM_only/beta_div/unweighted_unifrac_MSM_positive.txt"
dist.matrix.uwu.MSM.pos <- as.matrix(read.table(dist.file.uwu.MSM.pos,
  sep = "\t", header = T, row.names = 1, check = FALSE, quote = "\""))

adonis(as.dist(dist.matrix.uwu.MSM.pos) ~ RAI_frequency, data = df.MSM.pos,
  permutations = 10000)
```

All MSM

Weighted

```
dist.file.wu.MSM <- "~/Data/HIV_6runs/stats/MSM_only/beta_div/weighted_unifrac_MSM.txt"
dist.matrix.wu.MSM <- as.matrix(read.table(dist.file.wu.MSM,
  sep = "\t", header = T, row.names = 1, check = FALSE, quote = "\""))

adonis(as.dist(dist.matrix.wu.MSM) ~ RAI_frequency, data = df.MSM,
  permutations = 10000)
```

Unweighted

```
dist.file.uwu.MSM <- "~/Data/HIV_6runs/stats/MSM_only/beta_div/unweighted_unifrac_MSM.txt"
dist.matrix.uwu.MSM <- as.matrix(read.table(dist.file.uwu.MSM,
  sep = "\t", header = T, row.names = 1, check = FALSE, quote = "\""))

adonis(as.dist(dist.matrix.uwu.MSM) ~ RAI_frequency, data = df.MSM,
  permutations = 10000)
```

**Diet**

*Comparison of diets between HIV-negative MSM (n = 24) and non-MSM (n = 45) revealed several significant differences in diet composition*

```
group_significance.py
-i ~/Data/HIV_6runs/diet_data/diet_kcalnorm_MPED.txt
-o ~/Data/HIV_6runs/diet_data/diet_diferences.txt
-m ~/Data/HIV_6runs/metadadata/_metadadata_one_rep_6_30.txt
-c MSM
```

**Identifying HIV-associated microbiome differences while controlling for sexual behavior and gender.**

**Beta Diversity**

*This clustering pattern was not explained by CD4+ T cell count, viral load, CD4 nadir, CD4+CD38+HLA-DR+ and CD8+CD38+HLA-DR+ cells, antibiotic use in past 6 months, and engagement in RAI.*

Files

```
inf.women <- "~/Data/HIV_6runs/stats/women_only/nadir/all_women_metadata.txt"
df.women <- read.table(inf.women, header = TRUE, sep = "\t",
  strip.white = TRUE)

df.women.cd4 <- subset(df.women, cd4_value >= 0)
df.women.pos <- subset(df.women, HIV == "Positive")
```

CD4+ T cell count

```
cor.test(df.women$wu_PC1_women, df.women$cd4_value, method = "spearman")
```

```
##
## Spearman's rank correlation rho
##
## data: df.women$wu_PC1_women and df.women$cd4_value
## S = 988, p-value = 0.08
## alternative hypothesis: true rho is not equal to 0
## sample estimates:
##      rho
## -0.4529412
```

```
cor.test(df.women$wu_PC2_women, df.women$cd4_value, method = "spearman")
```

```
##
## Spearman's rank correlation rho
##
## data: df.women$wu_PC2_women and df.women$cd4_value
## S = 542, p-value = 0.4496
## alternative hypothesis: true rho is not equal to 0
## sample estimates:
##      rho
## 0.2029412
```

Viral Load

```
cor.test(df.women.pos$wu_PC1_women, df.women.pos$viral_load_value,
  method = "spearman")
```

```
## Warning in cor.test.default(df.women.pos$wu_PC1_women, df.women.pos
## $viral_load_value, : Cannot compute exact p-value with ties
##
## Spearman's rank correlation rho
##
## data: df.women.pos$wu_PC1_women and df.women.pos$viral_load_value
## S = 794.74, p-value = 0.5322
## alternative hypothesis: true rho is not equal to 0
## sample estimates:
##      rho
## -0.1687323
```

```
cor.test(df.women.pos$wu_PC2_women, df.women.pos$viral_load_value,
  method = "spearman")
```

```
## Warning in cor.test.default(df.women.pos$wu_PC2_women, df.women.pos
## $viral_load_value, : Cannot compute exact p-value with ties

##
## Spearman's rank correlation rho
##
## data: df.women.pos$wu_PC2_women and df.women.pos$viral_load_value
## S = 916.78, p-value = 0.1863
## alternative hypothesis: true rho is not equal to 0
## sample estimates:
##      rho
## -0.3482021
```

CD4 nadir

```
cor.test(df.women$wu_PC1_women, df.women$cd4_nadir, method = "spearman")
```

```
##
## Spearman's rank correlation rho
##
## data: df.women$wu_PC1_women and df.women$cd4_nadir
## S = 282, p-value = 0.459
## alternative hypothesis: true rho is not equal to 0
## sample estimates:
##      rho
## 0.2252747
```

```
cor.test(df.women$wu_PC2_women, df.women$cd4_nadir, method = "spearman")
```

```
##
## Spearman's rank correlation rho
##
## data: df.women$wu_PC2_women and df.women$cd4_nadir
## S = 416, p-value = 0.6428
## alternative hypothesis: true rho is not equal to 0
## sample estimates:
##      rho
## -0.1428571
```

CD4+CD38+HLA-DR+ cells

```
cor.test(df.women$wu_PC1_women, df.women$CD4.HLADR_CD38_percent,
method = "spearman")
```

```
## Warning in cor.test.default(df.women$wu_PC1_women, df.women
## $CD4.HLADR_CD38_percent, : Cannot compute exact p-value with ties

##
## Spearman's rank correlation rho
##
## data: df.women$wu_PC1_women and df.women$CD4.HLADR_CD38_percent
## S = 3000.8, p-value = 0.6769
## alternative hypothesis: true rho is not equal to 0
## sample estimates:
##      rho
## 0.08401602
```



```
cor.test(df.women$wu_PC2_women, df.women$CD4.HLADR_CD38_percent,
         method = "spearman")
```

```
## Warning in cor.test.default(df.women$wu_PC2_women, df.women
## $CD4.HLADR_CD38_percent, : Cannot compute exact p-value with ties
```

```
##
## Spearman's rank correlation rho
##
## data: df.women$wu_PC2_women and df.women$CD4.HLADR_CD38_percent
## S = 4399.5, p-value = 0.07989
## alternative hypothesis: true rho is not equal to 0
## sample estimates:
##      rho
## -0.3429609
```

CD8+CD38+HLA-DR+ cells

```
cor.test(df.women$wu_PC1_women, df.women$CD8.HLADR_CD38_percent,
         method = "spearman")
```

```
## Warning in cor.test.default(df.women$wu_PC1_women, df.women
## $CD8.HLADR_CD38_percent, : Cannot compute exact p-value with ties
```

```
##
## Spearman's rank correlation rho
##
## data: df.women$wu_PC1_women and df.women$CD8.HLADR_CD38_percent
## S = 3459.8, p-value = 0.781
## alternative hypothesis: true rho is not equal to 0
## sample estimates:
##      rho
## -0.05611835
```

```
cor.test(df.women$wu_PC2_women, df.women$CD8.HLADR_CD38_percent,
         method = "spearman")
```

```
## Warning in cor.test.default(df.women$wu_PC2_women, df.women
## $CD8.HLADR_CD38_percent, : Cannot compute exact p-value with ties
```

```
##
## Spearman's rank correlation rho
##
## data: df.women$wu_PC2_women and df.women$CD8.HLADR_CD38_percent
## S = 4127.9, p-value = 0.1902
## alternative hypothesis: true rho is not equal to 0
## sample estimates:
##      rho
## -0.2600457
```

antibiotic use in past 6 months

```
df.women.abx <- subset(df.women, antibiotics_past_6_months !=
                       "NA")
kruskal.test(wu_PC1_women ~ antibiotics_past_6_months, data = df.women.abx)
```

```
##
## Kruskal-Wallis rank sum test
```

```

##
## data: wu_PC1_women by antibiotics_past_6_months
## Kruskal-Wallis chi-squared = 5.6415, df = 1, p-value = 0.01754
kruskal.test(wu_PC2_women ~ antibiotics_past_6_months, data = df.women.abx)

##
## Kruskal-Wallis rank sum test
##
## data: wu_PC2_women by antibiotics_past_6_months
## Kruskal-Wallis chi-squared = 0.58435, df = 1, p-value = 0.4446
engagement in RAI
df.women.RAI <- subset(df.women, RAI_frequency != "NA")
kruskal.test(wu_PC1_women ~ RAI_frequency, data = df.women)

##
## Kruskal-Wallis rank sum test
##
## data: wu_PC1_women by RAI_frequency
## Kruskal-Wallis chi-squared = 3.6182, df = 2, p-value = 0.1638
kruskal.test(wu_PC2_women ~ RAI_frequency, data = df.women)

##
## Kruskal-Wallis rank sum test
##
## data: wu_PC2_women by RAI_frequency
## Kruskal-Wallis chi-squared = 5.6306, df = 2, p-value = 0.05989

```

## Longitudinal analysis of HIV-positive individuals before and after ART initiation

Files

```

inf.longitudinal <- "~/Data/HIV_6runs/stats/longitudinal/metadata_long_R.txt"
df.long <- read.table(inf.longitudinal, header = TRUE, sep = "\t",
  strip.white = TRUE)
df.wide <- reshape(data = df.long, timevar = "timepoint", direction = "wide",
  idvar = c("HIV_ID", "HIV", "group", "MSM", "gender", "race",
    "ethnicity", "uwu_distance", "wu_distance"))

```

Delta calculations

Time

```

df.wide$timedif.days <- as.Date(df.wide$study_visit_date.2, format = "%m/%d/%y") -
  as.Date(df.wide$study_visit_date.1, format = "%m/%d/%y")

## Warning in strptime(x, format, tz = "GMT"): unknown timezone 'zone/tz/'
## 2018c.1.0/zoneinfo/America/Denver'
df.wide$timedif.months <- as.numeric(df.wide$timedif.days)/30.4

```

Alpha diversity

```
df.wide$delta.oo <- df.wide$observed_otus.2 - df.wide$observed_otus.1
df.wide$delta.shannon <- df.wide$shannon.2 - df.wide$shannon.1
df.wide$delta.pd <- df.wide$PD_whole_tree.2 - df.wide$PD_whole_tree.1
```

CD4 and Viral Load

```
df.wide$delta.cd4 <- df.wide$cd4_value.2 - df.wide$cd4_value.1
df.wide$delta.vl <- df.wide$viral_load_value.2 - df.wide$viral_load_value.1
```

Subsetting the data into just the negative and the untreated to treated groups and 6-14 month sample window

```
df.wide.timefilt <- subset(df.wide, timedif.months <= 14 & timedif.months >=
  6 & group %in% c("neg", "UT"))
df.wide.timefilt.UT <- subset(df.wide.timefilt, group == "UT")
df.wide.timefilt.neg <- subset(df.wide.timefilt, group == "neg")
```

*The HIV-positive cohort had a significant increase in CD4+ T cell count and decrease in viral load post-treatment with plasma HIV RNA counts between 0 and 40*

```
wilcox.test(df.wide.timefilt.UT$cd4_value.1, df.wide.timefilt.UT$cd4_value.2,
  paired = T)
```

```
##
## Wilcoxon signed rank test with continuity correction
##
## data: df.wide.timefilt.UT$cd4_value.1 and df.wide.timefilt.UT$cd4_value.2
## V = 24, p-value = 0.01382
## alternative hypothesis: true location shift is not equal to 0
```

```
wilcox.test(df.wide.timefilt.UT$viral_load_value.1, df.wide.timefilt.UT$viral_load_value.2,
  paired = T)
```

```
##
## Wilcoxon signed rank test
##
## data: df.wide.timefilt.UT$viral_load_value.1 and df.wide.timefilt.UT$viral_load_value.2
## V = 136, p-value = 3.052e-05
## alternative hypothesis: true location shift is not equal to 0
```

*HIV-positive individuals had significantly higher weighted but not unweighted beta diversity across time points compared to the seronegative controls, suggesting ART initiation results in significant alteration of the community composition*

```
kruskal.test(uwu_distance ~ group, data = df.wide.timefilt)
```

```
##
## Kruskal-Wallis rank sum test
##
## data: uwu_distance by group
## Kruskal-Wallis chi-squared = 2.564, df = 1, p-value = 0.1093
```

```
kruskal.test(wu_distance ~ group, data = df.wide.timefilt)
```

```
##
## Kruskal-Wallis rank sum test
##
## data: wu_distance by group
## Kruskal-Wallis chi-squared = 3.8422, df = 1, p-value = 0.04998
```

*There was no significant difference in the change in alpha diversity between the two time points when comparing HIV-positive individuals and seronegative controls*

```
kruskal.test(delta.oo ~ group, data = df.wide.timefilt)
```

```
##  
## Kruskal-Wallis rank sum test  
##  
## data: delta.oo by group  
## Kruskal-Wallis chi-squared = 2.7452, df = 1, p-value = 0.09755
```

```
kruskal.test(delta.shannon ~ group, data = df.wide.timefilt)
```

```
##  
## Kruskal-Wallis rank sum test  
##  
## data: delta.shannon by group  
## Kruskal-Wallis chi-squared = 1.2812, df = 1, p-value = 0.2577
```

```
kruskal.test(delta.pd ~ group, data = df.wide.timefilt)
```

```
##  
## Kruskal-Wallis rank sum test  
##  
## data: delta.pd by group  
## Kruskal-Wallis chi-squared = 0.93369, df = 1, p-value = 0.3339
```

*There was no significant association between change in alpha or beta diversity and antibiotic usage in the 6 months prior to the second sample collection Files*

```
df.wide.timefilt$abx.ever <- with(df.wide.timefilt, ifelse(any(df.wide.timefilt$antibiotics_past_6_months == "Yes"),  
  "Yes", df.wide.timefilt$antibiotics_past_6_months.2 == "Yes"),  
  "Yes", "No"))
```

Beta diversity

```
kruskal.test(uwu_distance ~ abx.ever, data = df.wide.timefilt)  
kruskal.test(wu_distance ~ abx.ever, data = df.wide.timefilt)
```

Alpha diversity

```
kruskal.test(delta.oo ~ abx.ever, data = df.wide.timefilt)  
kruskal.test(delta.shannon ~ abx.ever, data = df.wide.timefilt)  
kruskal.test(delta.pd ~ abx.ever, data = df.wide.timefilt)
```
