# Supplementary material for: An exploration of Prevotella-rich microbiomes in HIV and men who have sex with men
Source: Microbiome. 2018 Nov 5;6:198. doi: 10.1186/s40168-018-0580-7 (PMC6219090; doi:10.1186/s40168-018-0580-7)
Supplement: Supplementary file 9 — Table S6. Table of significantly different OTUs between only HIV-negative MSM and non-MSM. OTUs significantly increased with MSM highlighted in orange OTUs significantly decreased in MSM highlighted in green (Kruskal-Wallis test). (XLSX 39 kb) [file 40168_2018_580_MOESM9_ESM.xlsx]

## Sheet: MWU_otus
OTU	Test-Statistic	P value	FDR P value	Bonferroni P	MSM mean	non-MSM mean	Change in MSM	taxonomy	kingdom	phylum	class	order	family	genus	species
4468891	19.0274	1.28857e-05	0.0033511	0.00344049	7.44	327.889	-320.449	k__Bacteria; p__Firmicutes; c__Erysipelotrichi; o__Erysipelotrichales; f__Erysipelotrichaceae; g__; s__	Bacteria	Firmicutes	Erysipelotrichi	Erysipelotrichales	Erysipelotrichaceae	Unclassified Erysipelotrichaceae	Unclassified Erysipelotrichaceae
4479835	16.0709	6.10141e-05	0.0033511	0.0162908	24.44	116.222	-91.7822	k__Bacteria; p__Bacteroidetes; c__Bacteroidia; o__Bacteroidales; f__Bacteroidaceae; g__Bacteroides; s__uniformis	Bacteria	Bacteroidetes	Bacteroidia	Bacteroidales	Bacteroidaceae	Bacteroides	uniformis
3931537	15.2247	9.5448e-05	0.0033511	0.0254846	1.76	24.5556	-22.7956	k__Bacteria; p__Firmicutes; c__Clostridia; o__Clostridiales; f__Clostridiaceae; g__Clostridium; s__	Bacteria	Firmicutes	Clostridia	Clostridiales	Clostridiaceae	Clostridium	Clostridium sp.
1124237	15.1683	9.83413e-05	0.0033511	0.0262571	0.16	4.22222	-4.06222	k__Bacteria; p__Actinobacteria; c__Coriobacteriia; o__Coriobacteriales; f__Coriobacteriaceae; g__Adlercreutzia; s__	Bacteria	Actinobacteria	Coriobacteriia	Coriobacteriales	Coriobacteriaceae	Adlercreutzia	Adlercreutzia sp.
357584	16.8992	3.94179e-05	0.0033511	0.0105246	44.36	0	44.36	k__Bacteria; p__Proteobacteria; c__Deltaproteobacteria; o__Desulfovibrionales; f__Desulfovibrionaceae; g__Desulfovibrio; s__	Bacteria	Proteobacteria	Deltaproteobacteria	Desulfovibrionales	Desulfovibrionaceae	Desulfovibrio	Desulfovibrio sp.
174509	15.6248	7.72357e-05	0.0033511	0.0206219	70.24	0	70.24	k__Bacteria; p__Firmicutes; c__Erysipelotrichi; o__Erysipelotrichales; f__Erysipelotrichaceae; g__[Eubacterium]; s__biforme	Bacteria	Firmicutes	Erysipelotrichi	Erysipelotrichales	Erysipelotrichaceae	Eubacterium	biforme
4434117	16.9502	3.83731e-05	0.0033511	0.0102456	228.2	15.6667	212.533	k__Bacteria; p__Firmicutes; c__Erysipelotrichi; o__Erysipelotrichales; f__Erysipelotrichaceae; g__[Eubacterium]; s__biforme	Bacteria	Firmicutes	Erysipelotrichi	Erysipelotrichales	Erysipelotrichaceae	Eubacterium	biforme
4482723	15.129	0.000100408	0.0033511	0.0268088	893.84	53.4444	840.396	k__Bacteria; p__Bacteroidetes; c__Bacteroidia; o__Bacteroidales; f__Prevotellaceae; g__Prevotella; s__copri	Bacteria	Bacteroidetes	Bacteroidia	Bacteroidales	Prevotellaceae	Prevotella	copri
178387	12.1817	0.000482603	0.0143172	0.128855	135.56	0	135.56	k__Bacteria; p__Bacteroidetes; c__Bacteroidia; o__Bacteroidales; f__Prevotellaceae; g__Prevotella; s__copri	Bacteria	Bacteroidetes	Bacteroidia	Bacteroidales	Prevotellaceae	Prevotella	copri
351880	11.1912	0.000821856	0.0219435	0.219435	0.32	3.33333	-3.01333	k__Bacteria; p__Firmicutes; c__Clostridia; o__Clostridiales; f__; g__; s__	Bacteria	Firmicutes	Clostridia	Clostridiales	Unclassified Clostridiales	Unclassified Clostridiales	Unclassified Clostridiales
4454582	10.4615	0.00121891	0.0231101	0.325448	2	82.3333	-80.3333	k__Bacteria; p__Bacteroidetes; c__Bacteroidia; o__Bacteroidales; f__Rikenellaceae; g__; s__	Bacteria	Bacteroidetes	Bacteroidia	Bacteroidales	Rikenellaceae	Unclassified Rikenellaceae	Unclassified Rikenellaceae
537661	10.0932	0.00148821	0.0231101	0.397353	0.32	4.66667	-4.34667	k__Bacteria; p__Firmicutes; c__Clostridia; o__Clostridiales; f__Lachnospiraceae; g__; s__	Bacteria	Firmicutes	Clostridia	Clostridiales	Lachnospiraceae	Unclassified Lachnospiraceae	Unclassified Lachnospiraceae
4319785	10.1915	0.00141093	0.0231101	0.376719	22.56	0	22.56	k__Bacteria; p__Bacteroidetes; c__Bacteroidia; o__Bacteroidales; f__[Paraprevotellaceae]; g__; s__	Bacteria	Bacteroidetes	Bacteroidia	Bacteroidales	Paraprevotellaceae	Unclassified Paraprevotellaceae	Unclassified Paraprevotellaceae
731422	10.8198	0.00100421	0.0231101	0.268125	66.36	13.8889	52.4711	k__Bacteria; p__Firmicutes; c__Clostridia; o__Clostridiales; f__Veillonellaceae; g__Phascolarctobacterium; s__	Bacteria	Firmicutes	Clostridia	Clostridiales	Veillonellaceae	Phascolarctobacterium	Phascolarctobacterium sp.
3862524	10.1897	0.00141229	0.0231101	0.377083	63.28	0	63.28	k__Bacteria; p__Bacteroidetes; c__Bacteroidia; o__Bacteroidales; f__[Paraprevotellaceae]; g__[Prevotella]; s__	Bacteria	Bacteroidetes	Bacteroidia	Bacteroidales	Paraprevotellaceae	Paraprevotella	Paraprevotella sp.
4452449	10.1879	0.00141366	0.0231101	0.377447	76.44	0	76.44	k__Bacteria; p__Bacteroidetes; c__Bacteroidia; o__Bacteroidales; f__Prevotellaceae; g__Prevotella; s__copri	Bacteria	Bacteroidetes	Bacteroidia	Bacteroidales	Prevotellaceae	Prevotella	copri
4304830	10.3504	0.00129446	0.0231101	0.345622	156.32	3.44444	152.876	k__Bacteria; p__Bacteroidetes; c__Bacteroidia; o__Bacteroidales; f__Prevotellaceae; g__Prevotella; s__stercorea	Bacteria	Bacteroidetes	Bacteroidia	Bacteroidales	Prevotellaceae	Prevotella	stercorea
48207	10.0087	0.00155799	0.0231101	0.415983	171.96	0.222222	171.738	k__Bacteria; p__Firmicutes; c__Clostridia; o__Clostridiales; f__Veillonellaceae; g__Dialister; s__	Bacteria	Firmicutes	Clostridia	Clostridiales	Veillonellaceae	Dialister	Dialister sp.
337010	9.5724	0.00197524	0.0277574	0.52739	2.32	0.111111	2.20889	k__Bacteria; p__Firmicutes; c__Clostridia; o__Clostridiales; f__; g__; s__	Bacteria	Firmicutes	Clostridia	Clostridiales	Unclassified Clostridiales	Unclassified Clostridiales	Unclassified Clostridiales
289313	9.27719	0.00232026	0.0295809	0.619508	40.04	0	40.04	k__Bacteria; p__Bacteroidetes; c__Bacteroidia; o__Bacteroidales; f__Prevotellaceae; g__Prevotella; s__	Bacteria	Bacteroidetes	Bacteroidia	Bacteroidales	Prevotellaceae	Prevotella	Prevotella sp.
73771	9.2722	0.00232659	0.0295809	0.621199	58.48	0	58.48	k__Bacteria; p__Proteobacteria; c__Betaproteobacteria; o__Burkholderiales; f__Alcaligenaceae; g__Sutterella; s__	Bacteria	Proteobacteria	Betaproteobacteria	Burkholderiales	Alcaligenaceae	Sutterella	Sutterella sp.
4480861	8.96566	0.00275101	0.0333873	0.734521	844.56	296.556	548.004	k__Bacteria; p__Firmicutes; c__Erysipelotrichi; o__Erysipelotrichales; f__Erysipelotrichaceae; g__Catenibacterium; s__	Bacteria	Firmicutes	Erysipelotrichi	Erysipelotrichales	Erysipelotrichaceae	Catenibacterium	Catenibacterium sp.
4376650	8.84818	0.00293382	0.0340578	0.78333	4.32	33.1111	-28.7911	k__Bacteria; p__Bacteroidetes; c__Bacteroidia; o__Bacteroidales; f__Rikenellaceae; g__; s__	Bacteria	Bacteroidetes	Bacteroidia	Bacteroidales	Rikenellaceae	Unclassified Rikenellaceae	Unclassified Rikenellaceae
4483061	8.49415	0.0035629	0.0344094	0.951295	13.28	64.4444	-51.1644	k__Bacteria; p__Bacteroidetes; c__Bacteroidia; o__Bacteroidales; f__Bacteroidaceae; g__Bacteroides; s__	Bacteria	Bacteroidetes	Bacteroidia	Bacteroidales	Bacteroidaceae	Bacteroides	Bacteroides sp.
4474760	8.41344	0.00372457	0.0344094	0.99446	7.92	0	7.92	k__Bacteria; p__Firmicutes; c__Clostridia; o__Clostridiales; f__Ruminococcaceae; g__; s__	Bacteria	Firmicutes	Clostridia	Clostridiales	Ruminococcaceae	Unclassified Ruminococcaceae	Unclassified Ruminococcaceae
925131	8.52327	0.00350635	0.0344094	0.936195	11.16	1.11111	10.0489	k__Bacteria; p__Bacteroidetes; c__Bacteroidia; o__Bacteroidales; f__Prevotellaceae; g__Prevotella; s__copri	Bacteria	Bacteroidetes	Bacteroidia	Bacteroidales	Prevotellaceae	Prevotella	copri
710432	8.41188	0.00372776	0.0344094	0.995312	12.4	0	12.4	k__Bacteria; p__Firmicutes; c__Clostridia; o__Clostridiales; f__Peptococcaceae; g__Peptococcus; s__	Bacteria	Firmicutes	Clostridia	Clostridiales	Peptococcaceae	Peptococcus	Peptococcus sp.
175554	8.45679	0.00363682	0.0344094	0.971032	89.4	30.1111	59.2889	k__Bacteria; p__Bacteroidetes; c__Bacteroidia; o__Bacteroidales; f__S24-7; g__; s__	Bacteria	Bacteroidetes	Bacteroidia	Bacteroidales	S24-7	Unclassified S24-7	Unclassified S24-7
4467905	8.40722	0.00373735	0.0344094	0.997871	78.12	0	78.12	k__Bacteria; p__Bacteroidetes; c__Bacteroidia; o__Bacteroidales; f__Prevotellaceae; g__Prevotella; s__stercorea	Bacteria	Bacteroidetes	Bacteroidia	Bacteroidales	Prevotellaceae	Prevotella	stercorea
4475169	7.59248	0.00586122	0.0504821	1	54.08	814.444	-760.364	k__Bacteria; p__Bacteroidetes; c__Bacteroidia; o__Bacteroidales; f__Prevotellaceae; g__Prevotella; s__copri	Bacteria	Bacteroidetes	Bacteroidia	Bacteroidales	Prevotellaceae	Prevotella	copri
4471917	7.61673	0.00578292	0.0504821	1	2.44	0	2.44	k__Bacteria; p__Actinobacteria; c__Coriobacteriia; o__Coriobacteriales; f__Coriobacteriaceae; g__; s__	Bacteria	Actinobacteria	Coriobacteriia	Coriobacteriales	Coriobacteriaceae	Unclassified Coriobacteriaceae	Unclassified Coriobacteriaceae
191478	7.18552	0.00734941	0.0613216	1	11.96	62	-50.04	k__Bacteria; p__Firmicutes; c__Clostridia; o__Clostridiales; f__Ruminococcaceae; g__; s__	Bacteria	Firmicutes	Clostridia	Clostridiales	Ruminococcaceae	Unclassified Ruminococcaceae	Unclassified Ruminococcaceae
261240	6.82079	0.00901026	0.0729012	1	23.72	0	23.72	k__Bacteria; p__Bacteroidetes; c__Bacteroidia; o__Bacteroidales; f__Prevotellaceae; g__Prevotella; s__	Bacteria	Bacteroidetes	Bacteroidia	Bacteroidales	Prevotellaceae	Prevotella	Prevotella sp.
298150	6.43697	0.0111769	0.0877715	1	2	14.3333	-12.3333	k__Bacteria; p__Firmicutes; c__Clostridia; o__Clostridiales; f__; g__; s__	Bacteria	Firmicutes	Clostridia	Clostridiales	Unclassified Clostridiales	Unclassified Clostridiales	Unclassified Clostridiales
4484376	6.14626	0.013169	0.0929782	1	160.72	302.556	-141.836	k__Bacteria; p__Bacteroidetes; c__Bacteroidia; o__Bacteroidales; f__Bacteroidaceae; g__Bacteroides; s__	Bacteria	Bacteroidetes	Bacteroidia	Bacteroidales	Bacteroidaceae	Bacteroides	Bacteroides sp.
4306262	6.21783	0.012647	0.0929782	1	7.12	25.4444	-18.3244	k__Bacteria; p__Verrucomicrobia; c__Verrucomicrobiae; o__Verrucomicrobiales; f__Verrucomicrobiaceae; g__Akkermansia; s__muciniphila	Bacteria	Verrucomicrobia	Verrucomicrobiae	Verrucomicrobiales	Verrucomicrobiaceae	Akkermansia	muciniphila
359872	6.21707	0.0126524	0.0929782	1	8.16	14.1111	-5.95111	k__Bacteria; p__Proteobacteria; c__Deltaproteobacteria; o__Desulfovibrionales; f__Desulfovibrionaceae; g__Bilophila; s__	Bacteria	Proteobacteria	Deltaproteobacteria	Desulfovibrionales	Desulfovibrionaceae	Bilophila	Bilophila sp.
2949921	6.10636	0.0134696	0.0929782	1	17.44	0.222222	17.2178	k__Bacteria; p__Firmicutes; c__Clostridia; o__Clostridiales; f__Clostridiaceae; g__; s__	Bacteria	Firmicutes	Clostridia	Clostridiales	Clostridiaceae	Unclassified Clostridiaceae	Unclassified Clostridiaceae
4396464	6.0918	0.0135811	0.0929782	1	56.84	0	56.84	k__Bacteria; p__Bacteroidetes; c__Bacteroidia; o__Bacteroidales; f__Prevotellaceae; g__Prevotella; s__stercorea	Bacteria	Bacteroidetes	Bacteroidia	Bacteroidales	Prevotellaceae	Prevotella	stercorea
292713	5.51066	0.018901	0.123087	1	0.28	9		k__Bacteria; p__Firmicutes; c__Clostridia; o__Clostridiales; f__Lachnospiraceae; g__Blautia; s__	Bacteria	Firmicutes	Clostridia	Clostridiales	Lachnospiraceae	Blautia	Blautia sp.
194101	5.52775	0.0187172	0.123087	1	6.76	73.2222		k__Bacteria; p__Firmicutes; c__Clostridia; o__Clostridiales; f__Ruminococcaceae; g__Ruminococcus; s__	Bacteria	Firmicutes	Clostridia	Clostridiales	Ruminococcaceae	Ruminococcus	Ruminococcus sp.
4469345	5.40526	0.0200762	0.123297	1	11.36	0		k__Bacteria; p__Firmicutes; c__Clostridia; o__Clostridiales; f__Veillonellaceae; g__Acidaminococcus; s__	Bacteria	Firmicutes	Clostridia	Clostridiales	Veillonellaceae	Acidaminococcus	Acidaminococcus sp.
364753	5.3834	0.0203292	0.123297	1	0.48	7.77778		k__Bacteria; p__Firmicutes; c__Clostridia; o__Clostridiales; f__Lachnospiraceae; g__Anaerostipes; s__	Bacteria	Firmicutes	Clostridia	Clostridiales	Lachnospiraceae	Anaerostipes	Anaerostipes sp.
4338745	5.33362	0.0209178	0.123297	1	28.36	4		k__Bacteria; p__Firmicutes; c__Clostridia; o__Clostridiales; f__Veillonellaceae; g__Mitsuokella; s__	Bacteria	Firmicutes	Clostridia	Clostridiales	Veillonellaceae	Mitsuokella	Mitsuokella sp.
4442548	5.40526	0.0200762	0.123297	1	25	0		k__Bacteria; p__Bacteroidetes; c__Bacteroidia; o__Bacteroidales; f__Prevotellaceae; g__Prevotella; s__	Bacteria	Bacteroidetes	Bacteroidia	Bacteroidales	Prevotellaceae	Prevotella	Prevotella sp.
288134	5.30681	0.0212422	0.123297	1	58.52	101.556		k__Bacteria; p__Firmicutes; c__Clostridia; o__Clostridiales; f__Lachnospiraceae; g__; s__	Bacteria	Firmicutes	Clostridia	Clostridiales	Lachnospiraceae	Unclassified Lachnospiraceae	Unclassified Lachnospiraceae
4449054	5.25438	0.0218916	0.124363	1	3.12	71.6667		k__Bacteria; p__Bacteroidetes; c__Bacteroidia; o__Bacteroidales; f__Bacteroidaceae; g__Bacteroides; s__caccae	Bacteria	Bacteroidetes	Bacteroidia	Bacteroidales	Bacteroidaceae	Bacteroides	caccae
289312	5.14417	0.0233245	0.129743	1	62.48	29.1111		k__Bacteria; p__Firmicutes; c__Clostridia; o__Clostridiales; f__Lachnospiraceae	Bacteria	Firmicutes	Clostridia	Clostridiales	Lachnospiraceae	Unclassified Lachnospiraceae	Unclassified Lachnospiraceae
304777	5.01389	0.0251448	0.137014	1	0.72	2.66667		k__Bacteria; p__Firmicutes; c__Clostridia; o__Clostridiales; f__Ruminococcaceae; g__Oscillospira; s__	Bacteria	Firmicutes	Clostridia	Clostridiales	Ruminococcaceae	Oscillospira	Oscillospira sp.
4456957	4.7576	0.0291692	0.139075	1	26.04	0		k__Bacteria; p__Bacteroidetes; c__Bacteroidia; o__Bacteroidales; f__Bacteroidaceae; g__Bacteroides; s__	Bacteria	Bacteroidetes	Bacteroidia	Bacteroidales	Bacteroidaceae	Bacteroides	Bacteroides sp.
4379332	4.7576	0.0291692	0.139075	1	8.16	0		k__Bacteria; p__Firmicutes; c__Clostridia; o__Clostridiales; f__Veillonellaceae; g__Mitsuokella; s__	Bacteria	Firmicutes	Clostridia	Clostridiales	Veillonellaceae	Mitsuokella	Mitsuokella sp.
4365526	4.7576	0.0291692	0.139075	1	301.88	0		k__Bacteria; p__Bacteroidetes; c__Bacteroidia; o__Bacteroidales; f__[Paraprevotellaceae]; g__[Prevotella]; s__	Bacteria	Bacteroidetes	Bacteroidia	Bacteroidales	Paraprevotellaceae	Paraprevotella	Paraprevotella sp.
4471486	4.75984	0.0291313	0.139075	1	16.92	0		k__Bacteria; p__Bacteroidetes; c__Bacteroidia; o__Bacteroidales; f__Prevotellaceae; g__Prevotella; s__stercorea	Bacteria	Bacteroidetes	Bacteroidia	Bacteroidales	Prevotellaceae	Prevotella	stercorea
4397095	4.75872	0.0291502	0.139075	1	4.6	0		k__Bacteria; p__Bacteroidetes; c__Bacteroidia; o__Bacteroidales; f__Rikenellaceae; g__; s__	Bacteria	Bacteroidetes	Bacteroidia	Bacteroidales	Rikenellaceae	Unclassified Rikenellaceae	Unclassified Rikenellaceae
2883976	4.76883	0.0289795	0.139075	1	4	0		k__Bacteria; p__Firmicutes; c__Clostridia; o__Clostridiales; f__Ruminococcaceae; g__; s__	Bacteria	Firmicutes	Clostridia	Clostridiales	Ruminococcaceae	Unclassified Ruminococcaceae	Unclassified Ruminococcaceae
denovo456	4.7576	0.0291692	0.139075	1	13.8	0		k__Bacteria; p__Proteobacteria; c__Gammaproteobacteria; o__Aeromonadales; f__Succinivibrionaceae	Bacteria	Proteobacteria	Gammaproteobacteria	Aeromonadales	Succinivibrionaceae	Unclassified Succinivibrionaceae	Unclassified Succinivibrionaceae
329351	4.51097	0.0336781	0.157755	1	14.76	5.77778		k__Bacteria; p__Firmicutes; c__Clostridia; o__Clostridiales; f__Lachnospiraceae; g__; s__	Bacteria	Firmicutes	Clostridia	Clostridiales	Lachnospiraceae	Unclassified Lachnospiraceae	Unclassified Lachnospiraceae
289089	4.45364	0.034827	0.160324	1	21.56	54.5556		k__Bacteria; p__Firmicutes; c__Clostridia; o__Clostridiales; f__Lachnospiraceae	Bacteria	Firmicutes	Clostridia	Clostridiales	Lachnospiraceae	Unclassified Lachnospiraceae	Unclassified Lachnospiraceae
4421507	4.30866	0.0379188	0.168739	1	36.96	0.333333		k__Bacteria; p__Bacteroidetes; c__Bacteroidia; o__Bacteroidales; f__Prevotellaceae; g__Prevotella; s__	Bacteria	Bacteroidetes	Bacteroidia	Bacteroidales	Prevotellaceae	Prevotella	Prevotella sp.
4473575	4.30935	0.0379035	0.168739	1	22.24	15.3333		k__Bacteria; p__Bacteroidetes; c__Bacteroidia; o__Bacteroidales; f__Prevotellaceae; g__Prevotella; s__	Bacteria	Bacteroidetes	Bacteroidia	Bacteroidales	Prevotellaceae	Prevotella	Prevotella sp.
4443944	4.20728	0.0402509	0.17618	1	173.24	122.111		k__Bacteria; p__Bacteroidetes; c__Bacteroidia; o__Bacteroidales; f__Prevotellaceae; g__Prevotella; s__copri	Bacteria	Bacteroidetes	Bacteroidia	Bacteroidales	Prevotellaceae	Prevotella	copri
345502	4.14881	0.0416638	0.179423	1	3.04	0		k__Bacteria; p__Firmicutes; c__Clostridia; o__Clostridiales; f__Lachnospiraceae; g__; s__	Bacteria	Firmicutes	Clostridia	Clostridiales	Lachnospiraceae	Unclassified Lachnospiraceae	Unclassified Lachnospiraceae
4440268	4.06454	0.0437927	0.185598	1	6.28	19.4444		k__Bacteria; p__Bacteroidetes; c__Bacteroidia; o__Bacteroidales; f__Porphyromonadaceae; g__Parabacteroides; s__distasonis	Bacteria	Bacteroidetes	Bacteroidia	Bacteroidales	Porphyromonadaceae	Parabacteroides	distasonis
314565	3.92779	0.0474942	0.19814	1	50.44	10.1111		k__Bacteria; p__Firmicutes; c__Clostridia; o__Clostridiales; f__Ruminococcaceae; g__; s__	Bacteria	Firmicutes	Clostridia	Clostridiales	Ruminococcaceae	Unclassified Ruminococcaceae	Unclassified Ruminococcaceae
4480787	3.9004	0.0482747	0.198298	1	50.56	151.778		k__Bacteria; p__Bacteroidetes; c__Bacteroidia; o__Bacteroidales; f__Porphyromonadaceae; g__Parabacteroides; s__	Bacteria	Bacteroidetes	Bacteroidia	Bacteroidales	Porphyromonadaceae	Parabacteroides	Parabacteroides sp.
3168396	3.57056	0.0588123	0.212201	1	27.28	0		k__Bacteria; p__Firmicutes; c__Clostridia; o__Clostridiales; f__Veillonellaceae; g__Anaerovibrio; s__	Bacteria	Firmicutes	Clostridia	Clostridiales	Veillonellaceae	Anaerovibrio	Anaerovibrio sp.
306848	3.75637	0.0526068	0.212201	1	55.8	18.6667		k__Bacteria; p__Firmicutes; c__Clostridia; o__Clostridiales; f__Lachnospiraceae; g__Coprococcus; s__	Bacteria	Firmicutes	Clostridia	Clostridiales	Lachnospiraceae	Coprococcus	Coprococcus sp.
314996	3.57056	0.0588123	0.212201	1	13.6	0		k__Bacteria; p__Firmicutes; c__Clostridia; o__Clostridiales; f__Lachnospiraceae; g__Coprococcus; s__eutactus	Bacteria	Firmicutes	Clostridia	Clostridiales	Lachnospiraceae	Coprococcus	eutactus
4401935	3.57155	0.0587774	0.212201	1	49.24	0		k__Bacteria; p__Bacteroidetes; c__Bacteroidia; o__Bacteroidales; f__; g__; s__	Bacteria	Bacteroidetes	Bacteroidia	Bacteroidales	Unclassified Bacteroidales	Unclassified Bacteroidales	Unclassified Bacteroidales
4427960	3.57056	0.0588123	0.212201	1	23.76	0		k__Bacteria; p__Bacteroidetes; c__Bacteroidia; o__Bacteroidales; f__; g__; s__	Bacteria	Bacteroidetes	Bacteroidia	Bacteroidales	Unclassified Bacteroidales	Unclassified Bacteroidales	Unclassified Bacteroidales
4456020	3.57056	0.0588123	0.212201	1	22.56	0		k__Bacteria; p__Bacteroidetes; c__Bacteroidia; o__Bacteroidales; f__; g__; s__	Bacteria	Bacteroidetes	Bacteroidia	Bacteroidales	Unclassified Bacteroidales	Unclassified Bacteroidales	Unclassified Bacteroidales
591439	3.71101	0.0540547	0.212201	1	3	0.666667		k__Bacteria; p__Firmicutes; c__Clostridia; o__Clostridiales; f__[Mogibacteriaceae]; g__; s__	Bacteria	Firmicutes	Clostridia	Clostridiales	Mogibacteriaceae	Unclassified Mogibacteriaceae	Unclassified Mogibacteriaceae
318190	3.68286	0.0549744	0.212201	1	13.56	33.8889		k__Bacteria; p__Firmicutes; c__Clostridia; o__Clostridiales; f__Ruminococcaceae; g__; s__	Bacteria	Firmicutes	Clostridia	Clostridiales	Ruminococcaceae	Unclassified Ruminococcaceae	Unclassified Ruminococcaceae
4439639	3.57056	0.0588123	0.212201	1	18.56	0		k__Bacteria; p__Bacteroidetes; c__Bacteroidia; o__Bacteroidales; f__S24-7; g__; s__	Bacteria	Bacteroidetes	Bacteroidia	Bacteroidales	S24-7	Unclassified S24-7	Unclassified S24-7
262919	3.4402	0.0636281	0.223535	1	45.28	63.3333		k__Bacteria; p__Firmicutes; c__Clostridia; o__Clostridiales; f__Lachnospiraceae; g__Blautia; s__	Bacteria	Firmicutes	Clostridia	Clostridiales	Lachnospiraceae	Blautia	Blautia sp.
24370	3.45433	0.0630863	0.223535	1	81.4	27.7778		k__Bacteria; p__Firmicutes; c__Clostridia; o__Clostridiales; f__Veillonellaceae; g__Megasphaera; s__	Bacteria	Firmicutes	Clostridia	Clostridiales	Veillonellaceae	Megasphaera	Megasphaera sp.
4347159	3.01711	0.08239	0.23911	1	64.88	130.889		k__Bacteria; p__Actinobacteria; c__Actinobacteria; o__Bifidobacteriales; f__Bifidobacteriaceae; g__Bifidobacterium; s__adolescentis	Bacteria	Actinobacteria	Actinobacteria	Bifidobacteriales	Bifidobacteriaceae	Bifidobacterium	adolescentis
164006	3.02724	0.0818773	0.23911	1	16.88	0		k__Bacteria; p__Firmicutes; c__Erysipelotrichi; o__Erysipelotrichales; f__Erysipelotrichaceae; g__Bulleidia; s__	Bacteria	Firmicutes	Erysipelotrichi	Erysipelotrichales	Erysipelotrichaceae	Bulleidia	Bulleidia sp.
301696	3.02816	0.0818306	0.23911	1	4.8	0		k__Bacteria; p__Firmicutes; c__Clostridia; o__Clostridiales; f__Lachnospiraceae; g__Butyrivibrio; s__	Bacteria	Firmicutes	Clostridia	Clostridiales	Lachnospiraceae	Butyrivibrio	Butyrivibrio sp.
584703	3.02816	0.0818306	0.23911	1	1.28	0		k__Bacteria; p__Fusobacteria; c__Fusobacteriia; o__Fusobacteriales; f__Fusobacteriaceae; g__Fusobacterium; s__	Bacteria	Fusobacteria	Fusobacteriia	Fusobacteriales	Fusobacteriaceae	Fusobacterium	Fusobacterium sp.
150477	3.02724	0.0818773	0.23911	1	3.56	0		k__Archaea; p__Euryarchaeota; c__Methanobacteria; o__Methanobacteriales; f__Methanobacteriaceae; g__Methanosphaera; s__	Archaea	Euryarchaeota	Methanobacteria	Methanobacteriales	Methanobacteriaceae	Methanosphaera	Methanosphaera sp.
4454432	3.09656	0.078458	0.23911	1	27.36	42		k__Bacteria; p__Firmicutes; c__Clostridia; o__Clostridiales; f__Clostridiaceae; g__; s__	Bacteria	Firmicutes	Clostridia	Clostridiales	Clostridiaceae	Unclassified Clostridiaceae	Unclassified Clostridiaceae
352243	3.09082	0.078735	0.23911	1	1.92	8.66667		k__Bacteria; p__Firmicutes; c__Clostridia; o__Clostridiales; f__; g__; s__	Bacteria	Firmicutes	Clostridia	Clostridiales	Unclassified Clostridiales	Unclassified Clostridiales	Unclassified Clostridiales
4377146	3.03095	0.0816904	0.23911	1	4.68	0		k__Bacteria; p__Firmicutes; c__Clostridia; o__Clostridiales; f__; g__; s__	Bacteria	Firmicutes	Clostridia	Clostridiales	Unclassified Clostridiales	Unclassified Clostridiales	Unclassified Clostridiales
denovo888	3.02816	0.0818306	0.23911	1	6.48	0		k__Bacteria; p__Proteobacteria; c__Betaproteobacteria; o__Burkholderiales; f__Comamonadaceae; g__; s__	Bacteria	Proteobacteria	Betaproteobacteria	Burkholderiales	Comamonadaceae	Unclassified Comamonadaceae	Unclassified Comamonadaceae
4335376	3.02202	0.082141	0.23911	1	2.64	0.111111		k__Bacteria; p__Actinobacteria; c__Coriobacteriia; o__Coriobacteriales; f__Coriobacteriaceae; g__; s__	Bacteria	Actinobacteria	Coriobacteriia	Coriobacteriales	Coriobacteriaceae	Unclassified Coriobacteriaceae	Unclassified Coriobacteriaceae
4336947	3.30065	0.0692525	0.23911	1	3.2	1.22222		k__Bacteria; p__Proteobacteria; c__Deltaproteobacteria; o__Desulfovibrionales; f__Desulfovibrionaceae; g__; s__	Bacteria	Proteobacteria	Deltaproteobacteria	Desulfovibrionales	Desulfovibrionaceae	Unclassified Desulfovibrionaceae	Unclassified Desulfovibrionaceae
299814	3.26224	0.0708921	0.23911	1	5.88	14.6667		k__Bacteria; p__Firmicutes; c__Clostridia; o__Clostridiales; f__Lachnospiraceae; g__; s__	Bacteria	Firmicutes	Clostridia	Clostridiales	Lachnospiraceae	Unclassified Lachnospiraceae	Unclassified Lachnospiraceae
4322863	3.02909	0.0817838	0.23911	1	2.68	0		k__Bacteria; p__Firmicutes; c__Clostridia; o__Clostridiales; f__Lachnospiraceae; g__; s__	Bacteria	Firmicutes	Clostridia	Clostridiales	Lachnospiraceae	Unclassified Lachnospiraceae	Unclassified Lachnospiraceae
denovo996	3.03095	0.0816904	0.23911	1	2	0		k__Bacteria; p__Firmicutes; c__Clostridia; o__Clostridiales; f__Lachnospiraceae; g__; s__	Bacteria	Firmicutes	Clostridia	Clostridiales	Lachnospiraceae	Unclassified Lachnospiraceae	Unclassified Lachnospiraceae
4472769	3.24184	0.0717799	0.23911	1	43.24	11		k__Bacteria; p__Firmicutes; c__Clostridia; o__Clostridiales; f__Peptostreptococcaceae; g__; s__	Bacteria	Firmicutes	Clostridia	Clostridiales	Peptostreptococcaceae	Unclassified Peptostreptococcaceae	Unclassified Peptostreptococcaceae
3559871	3.10219	0.0781871	0.23911	1	5.52	0.222222		k__Bacteria; p__Firmicutes; c__Clostridia; o__Clostridiales; f__Ruminococcaceae; g__; s__	Bacteria	Firmicutes	Clostridia	Clostridiales	Ruminococcaceae	Unclassified Ruminococcaceae	Unclassified Ruminococcaceae
4452031	2.92137	0.0874137	0.243119	1	55.4	104.667		k__Bacteria; p__Bacteroidetes; c__Bacteroidia; o__Bacteroidales; f__Porphyromonadaceae; g__Parabacteroides; s__distasonis	Bacteria	Bacteroidetes	Bacteroidia	Bacteroidales	Porphyromonadaceae	Parabacteroides	distasonis
4332878	2.96178	0.0852542	0.243119	1	2.64	1.44444		k__Bacteria; p__Actinobacteria; c__Coriobacteriia; o__Coriobacteriales; f__Coriobacteriaceae; g__Slackia; s__	Bacteria	Actinobacteria	Coriobacteriia	Coriobacteriales	Coriobacteriaceae	Slackia	Slackia sp.
341101	2.93589	0.0866311	0.243119	1	6.16	16.7778		k__Bacteria; p__Firmicutes; c__Clostridia; o__Clostridiales; f__Lachnospiraceae; g__; s__	Bacteria	Firmicutes	Clostridia	Clostridiales	Lachnospiraceae	Unclassified Lachnospiraceae	Unclassified Lachnospiraceae
4476780	2.9396	0.0864324	0.243119	1	4.68	10.3333		k__Bacteria; p__Bacteroidetes; c__Bacteroidia; o__Bacteroidales; f__Rikenellaceae; g__; s__	Bacteria	Bacteroidetes	Bacteroidia	Bacteroidales	Rikenellaceae	Unclassified Rikenellaceae	Unclassified Rikenellaceae
308072	2.85593	0.0910376	0.250588	1	10.28	3.33333		k__Bacteria; p__Firmicutes; c__Clostridia; o__Clostridiales; f__; g__; s__	Bacteria	Firmicutes	Clostridia	Clostridiales	Unclassified Clostridiales	Unclassified Clostridiales	Unclassified Clostridiales
147484	2.80781	0.0938065	0.255575	1	2.84	1.22222		k__Bacteria; p__Firmicutes; c__Clostridia; o__Clostridiales; f__[Mogibacteriaceae]; g__; s__	Bacteria	Firmicutes	Clostridia	Clostridiales	Mogibacteriaceae	Unclassified Mogibacteriaceae	Unclassified Mogibacteriaceae
4332078	2.70753	0.0998755	0.269361	1	6.32	1.77778		k__Bacteria; p__Firmicutes; c__Clostridia; o__Clostridiales; f__Clostridiaceae; g__; s__	Bacteria	Firmicutes	Clostridia	Clostridiales	Clostridiaceae	Unclassified Clostridiaceae	Unclassified Clostridiaceae
361845	2.68823	0.101092	0.269916	1	2.28	6.88889		k__Bacteria; p__Firmicutes; c__Clostridia; o__Clostridiales; f__Lachnospiraceae; g__; s__	Bacteria	Firmicutes	Clostridia	Clostridiales	Lachnospiraceae	Unclassified Lachnospiraceae	Unclassified Lachnospiraceae
4397092	2.66271	0.102725	0.271561	1	4.56	5.77778		k__Bacteria; p__Actinobacteria; c__Coriobacteriia; o__Coriobacteriales; f__Coriobacteriaceae; g__; s__	Bacteria	Actinobacteria	Coriobacteriia	Coriobacteriales	Coriobacteriaceae	Unclassified Coriobacteriaceae	Unclassified Coriobacteriaceae
187006	2.6286	0.104954	0.274733	1	9.52	0.222222		k__Bacteria; p__Firmicutes; c__Clostridia; o__Clostridiales; f__Ruminococcaceae; g__; s__	Bacteria	Firmicutes	Clostridia	Clostridiales	Ruminococcaceae	Unclassified Ruminococcaceae	Unclassified Ruminococcaceae
2201995	2.58083	0.108165	0.277693	1	9.48	22.1111		k__Bacteria; p__Proteobacteria; c__Betaproteobacteria; o__Burkholderiales; f__Alcaligenaceae; g__Sutterella; s__	Bacteria	Proteobacteria	Betaproteobacteria	Burkholderiales	Alcaligenaceae	Sutterella	Sutterella sp.
536167	2.59113	0.107464	0.277693	1	1.36	2.66667		k__Bacteria; p__Firmicutes; c__Clostridia; o__Clostridiales; f__Lachnospiraceae; g__; s__	Bacteria	Firmicutes	Clostridia	Clostridiales	Lachnospiraceae	Unclassified Lachnospiraceae	Unclassified Lachnospiraceae
357471	2.56182	0.109472	0.278372	1	3.16	12.4444		k__Bacteria; p__Firmicutes; c__Clostridia; o__Clostridiales; f__; g__; s__	Bacteria	Firmicutes	Clostridia	Clostridiales	Unclassified Clostridiales	Unclassified Clostridiales	Unclassified Clostridiales
4321260	2.45827	0.116907	0.294474	1	300.44	89.2222		k__Bacteria; p__Bacteroidetes; c__Bacteroidia; o__Bacteroidales; f__[Paraprevotellaceae]; g__[Prevotella]; s__	Bacteria	Bacteroidetes	Bacteroidia	Bacteroidales	Paraprevotellaceae	Paraprevotella	Paraprevotella sp.
163857	2.40638	0.120841	0.296006	1	416.56	0.111111		k__Bacteria; p__Proteobacteria; c__Gammaproteobacteria; o__Aeromonadales; f__Succinivibrionaceae; g__Succinivibrio; s__	Bacteria	Proteobacteria	Gammaproteobacteria	Aeromonadales	Succinivibrionaceae	Succinivibrio	Succinivibrio sp.
294710	2.42944	0.119075	0.296006	1	5.96	14.8889		k__Bacteria; p__Firmicutes; c__Clostridia; o__Clostridiales; f__Lachnospiraceae; g__; s__	Bacteria	Firmicutes	Clostridia	Clostridiales	Lachnospiraceae	Unclassified Lachnospiraceae	Unclassified Lachnospiraceae
306444	2.40922	0.120622	0.296006	1	4.36	0.222222		k__Bacteria; p__Firmicutes; c__Clostridia; o__Clostridiales; f__Ruminococcaceae; g__; s__	Bacteria	Firmicutes	Clostridia	Clostridiales	Ruminococcaceae	Unclassified Ruminococcaceae	Unclassified Ruminococcaceae
4484395	2.28874	0.130316	0.316312	1	34.56	57.8889		k__Bacteria; p__Bacteroidetes; c__Bacteroidia; o__Bacteroidales; f__Bacteroidaceae; g__Bacteroides; s__ovatus	Bacteria	Bacteroidetes	Bacteroidia	Bacteroidales	Bacteroidaceae	Bacteroides	ovatus
368992	2.2578	0.132943	0.319781	1	10.32	63.2222		k__Bacteria; p__Proteobacteria; c__Betaproteobacteria; o__Burkholderiales; f__Alcaligenaceae; g__Sutterella; s__	Bacteria	Proteobacteria	Betaproteobacteria	Burkholderiales	Alcaligenaceae	Sutterella	Sutterella sp.
4343479	2.21077	0.13705	0.326718	1	20.4	4.33333		k__Bacteria; p__Firmicutes; c__Clostridia; o__Clostridiales; f__Ruminococcaceae; g__; s__	Bacteria	Firmicutes	Clostridia	Clostridiales	Ruminococcaceae	Unclassified Ruminococcaceae	Unclassified Ruminococcaceae
322835	1.97723	0.159682	0.377303	1	6.2	12.5556		k__Bacteria; p__Firmicutes; c__Clostridia; o__Clostridiales; f__Lachnospiraceae; g__Lachnospira; s__	Bacteria	Firmicutes	Clostridia	Clostridiales	Lachnospiraceae	Lachnospira	Lachnospira sp.
292228	1.93576	0.16413	0.378444	1	16.32	41.6667		k__Bacteria; p__Firmicutes; c__Clostridia; o__Clostridiales; f__Lachnospiraceae; g__Blautia; s__	Bacteria	Firmicutes	Clostridia	Clostridiales	Lachnospiraceae	Blautia	Blautia sp.
309433	1.9202	0.165835	0.378444	1	13.12	5.88889		k__Bacteria; p__Firmicutes; c__Clostridia; o__Clostridiales; f__Lachnospiraceae; g__Lachnospira; s__	Bacteria	Firmicutes	Clostridia	Clostridiales	Lachnospiraceae	Lachnospira	Lachnospira sp.
4420534	1.92105	0.165741	0.378444	1	2.76	1.55556		k__Bacteria; p__Actinobacteria; c__Coriobacteriia; o__Coriobacteriales; f__Coriobacteriaceae; g__; s__	Bacteria	Actinobacteria	Coriobacteriia	Coriobacteriales	Coriobacteriaceae	Unclassified Coriobacteriaceae	Unclassified Coriobacteriaceae
4480359	1.93785	0.163902	0.378444	1	54.36	13.3333		k__Bacteria; p__Firmicutes; c__Clostridia; o__Clostridiales; f__Ruminococcaceae; g__; s__	Bacteria	Firmicutes	Clostridia	Clostridiales	Ruminococcaceae	Unclassified Ruminococcaceae	Unclassified Ruminococcaceae
4361517	1.83748	0.175247	0.389925	1	2	13.1111		k__Bacteria; p__Proteobacteria; c__Betaproteobacteria; o__Burkholderiales; f__Alcaligenaceae; g__Sutterella; s__	Bacteria	Proteobacteria	Betaproteobacteria	Burkholderiales	Alcaligenaceae	Sutterella	Sutterella sp.
292740	1.84392	0.174493	0.389925	1	3.64	0.333333		k__Bacteria; p__Firmicutes; c__Clostridia; o__Clostridiales; f__; g__; s__	Bacteria	Firmicutes	Clostridia	Clostridiales	Unclassified Clostridiales	Unclassified Clostridiales	Unclassified Clostridiales
345454	1.85568	0.173125	0.389925	1	8.6	4.11111		k__Bacteria; p__Firmicutes; c__Clostridia; o__Clostridiales; f__Lachnospiraceae; g__; s__	Bacteria	Firmicutes	Clostridia	Clostridiales	Lachnospiraceae	Unclassified Lachnospiraceae	Unclassified Lachnospiraceae
4395646	1.81427	0.177997	0.39277	1	46.76	130.222		k__Bacteria; p__Firmicutes; c__Clostridia; o__Clostridiales; f__Lachnospiraceae; g__; s__	Bacteria	Firmicutes	Clostridia	Clostridiales	Lachnospiraceae	Unclassified Lachnospiraceae	Unclassified Lachnospiraceae
358675	1.77676	0.182548	0.399511	1	10.8	1.66667		k__Bacteria; p__Firmicutes; c__Clostridia; o__Clostridiales; f__Lachnospiraceae; g__; s__	Bacteria	Firmicutes	Clostridia	Clostridiales	Lachnospiraceae	Unclassified Lachnospiraceae	Unclassified Lachnospiraceae
307680	1.76042	0.184573	0.400657	1	35.52	6		k__Bacteria; p__Firmicutes; c__Clostridia; o__Clostridiales; f__Lachnospiraceae; g__; s__	Bacteria	Firmicutes	Clostridia	Clostridiales	Lachnospiraceae	Unclassified Lachnospiraceae	Unclassified Lachnospiraceae
308242	1.73663	0.187567	0.403873	1	9.88	4.77778		k__Bacteria; p__Firmicutes; c__Clostridia; o__Clostridiales; f__Lachnospiraceae; g__; s__	Bacteria	Firmicutes	Clostridia	Clostridiales	Lachnospiraceae	Unclassified Lachnospiraceae	Unclassified Lachnospiraceae
197539	1.70986	0.191004	0.407984	1	5.36	0.222222		k__Bacteria; p__Firmicutes; c__Clostridia; o__Clostridiales; f__; g__; s__	Bacteria	Firmicutes	Clostridia	Clostridiales	Unclassified Clostridiales	Unclassified Clostridiales	Unclassified Clostridiales
4479129	1.63584	0.200898	0.425711	1	9.04	10.8889		k__Bacteria; p__Bacteroidetes; c__Bacteroidia; o__Bacteroidales; f__[Odoribacteraceae]; g__Odoribacter; s__	Bacteria	Bacteroidetes	Bacteroidia	Bacteroidales	Odoribacteraceae	Odoribacter	Odoribacter sp.
198914	1.61887	0.20325	0.427304	1	0.24	2		k__Bacteria; p__Firmicutes; c__Erysipelotrichi; o__Erysipelotrichales; f__Erysipelotrichaceae; g__Holdemania; s__	Bacteria	Firmicutes	Erysipelotrichi	Erysipelotrichales	Erysipelotrichaceae	Holdemania	Holdemania sp.
291448	1.54498	0.213878	0.446136	1	5.68	16.1111		k__Bacteria; p__Firmicutes; c__Clostridia; o__Clostridiales; f__; g__; s__	Bacteria	Firmicutes	Clostridia	Clostridiales	Unclassified Clostridiales	Unclassified Clostridiales	Unclassified Clostridiales
191313	1.51246	0.218764	0.45279	1	203.24	341.667		k__Bacteria; p__Firmicutes; c__Clostridia; o__Clostridiales; f__Ruminococcaceae; g__Faecalibacterium; s__prausnitzii	Bacteria	Firmicutes	Clostridia	Clostridiales	Ruminococcaceae	Faecalibacterium	prausnitzii
4428013	1.501	0.220517	0.452909	1	115.2	34.7778		k__Bacteria; p__Firmicutes; c__Clostridia; o__Clostridiales; f__Ruminococcaceae; g__; s__	Bacteria	Firmicutes	Clostridia	Clostridiales	Ruminococcaceae	Unclassified Ruminococcaceae	Unclassified Ruminococcaceae
246717	1.47708	0.224232	0.455883	1	0.68	139.111		k__Bacteria; p__Proteobacteria; c__Epsilonproteobacteria; o__Campylobacterales; f__Campylobacteraceae; g__Campylobacter; s__	Bacteria	Proteobacteria	Epsilonproteobacteria	Campylobacterales	Campylobacteraceae	Campylobacter	Campylobacter sp.
349087	1.46978	0.225381	0.455883	1	1.36	2.33333		k__Bacteria; p__Firmicutes; c__Clostridia; o__Clostridiales; f__Lachnospiraceae; g__; s__	Bacteria	Firmicutes	Clostridia	Clostridiales	Lachnospiraceae	Unclassified Lachnospiraceae	Unclassified Lachnospiraceae
298592	1.39475	0.237604	0.476995	1	140.08	0.222222		k__Bacteria; p__Fusobacteria; c__Fusobacteriia; o__Fusobacteriales; f__Fusobacteriaceae; g__Fusobacterium; s__	Bacteria	Fusobacteria	Fusobacteriia	Fusobacteriales	Fusobacteriaceae	Fusobacterium	Fusobacterium sp.
261328	1.33878	0.24725	0.490481	1	17.6	28.7778		k__Bacteria; p__Firmicutes; c__Clostridia; o__Clostridiales; f__; g__; s__	Bacteria	Firmicutes	Clostridia	Clostridiales	Unclassified Clostridiales	Unclassified Clostridiales	Unclassified Clostridiales
216710	1.33456	0.247996	0.490481	1	1.16	0.111111		k__Bacteria; p__Firmicutes; c__Clostridia; o__Clostridiales; f__Ruminococcaceae; g__; s__	Bacteria	Firmicutes	Clostridia	Clostridiales	Ruminococcaceae	Unclassified Ruminococcaceae	Unclassified Ruminococcaceae
356782	1.29418	0.255279	0.501173	1	20	29.7778		k__Bacteria; p__Firmicutes; c__Clostridia; o__Clostridiales; f__Lachnospiraceae; g__; s__	Bacteria	Firmicutes	Clostridia	Clostridiales	Lachnospiraceae	Unclassified Lachnospiraceae	Unclassified Lachnospiraceae
294606	1.2829	0.257361	0.501573	1	39.36	75.2222		k__Bacteria; p__Firmicutes; c__Clostridia; o__Clostridiales; f__Lachnospiraceae; g__Blautia; s__	Bacteria	Firmicutes	Clostridia	Clostridiales	Lachnospiraceae	Blautia	Blautia sp.
643382	1.25503	0.262594	0.508062	1	2.4	0.555556		k__Bacteria; p__Firmicutes; c__Clostridia; o__Clostridiales; f__Ruminococcaceae; g__; s__	Bacteria	Firmicutes	Clostridia	Clostridiales	Ruminococcaceae	Unclassified Ruminococcaceae	Unclassified Ruminococcaceae
296834	1.22768	0.267859	0.508501	1	10.24	15		k__Bacteria; p__Firmicutes; c__Clostridia; o__Clostridiales; f__Lachnospiraceae; g__; s__	Bacteria	Firmicutes	Clostridia	Clostridiales	Lachnospiraceae	Unclassified Lachnospiraceae	Unclassified Lachnospiraceae
196175	1.22422	0.268534	0.508501	1	2.92	0.777778		k__Bacteria; p__Firmicutes; c__Clostridia; o__Clostridiales; f__Ruminococcaceae; g__; s__	Bacteria	Firmicutes	Clostridia	Clostridiales	Ruminococcaceae	Unclassified Ruminococcaceae	Unclassified Ruminococcaceae
4372973	1.24356	0.264786	0.508501	1	6.04	7.11111		k__Bacteria; p__Firmicutes; c__Clostridia; o__Clostridiales; f__Ruminococcaceae; g__; s__	Bacteria	Firmicutes	Clostridia	Clostridiales	Ruminococcaceae	Unclassified Ruminococcaceae	Unclassified Ruminococcaceae
350091	1.19688	0.273947	0.511495	1	1.56	2.77778		k__Bacteria; p__Firmicutes; c__Clostridia; o__Clostridiales; f__Lachnospiraceae; g__Dorea; s__	Bacteria	Firmicutes	Clostridia	Clostridiales	Lachnospiraceae	Dorea	Dorea sp.
4437359	1.206	0.272125	0.511495	1	22.16	6.33333		k__Bacteria; p__Firmicutes; c__Clostridia; o__Clostridiales; f__Ruminococcaceae; g__Oscillospira; s__	Bacteria	Firmicutes	Clostridia	Clostridiales	Ruminococcaceae	Oscillospira	Oscillospira sp.
4474049	1.16909	0.279589	0.514829	1	2.88	3.55556		k__Bacteria; p__Firmicutes; c__Clostridia; o__Clostridiales; f__Ruminococcaceae; g__Oscillospira; s__	Bacteria	Firmicutes	Clostridia	Clostridiales	Ruminococcaceae	Oscillospira	Oscillospira sp.
4201620	1.17592	0.278189	0.514829	1	19.08	18.2222		k__Bacteria; p__Bacteroidetes; c__Bacteroidia; o__Bacteroidales; f__Rikenellaceae; g__; s__	Bacteria	Bacteroidetes	Bacteroidia	Bacteroidales	Rikenellaceae	Unclassified Rikenellaceae	Unclassified Rikenellaceae
291571	1.14904	0.28375	0.518913	1	6.12	1.44444		k__Bacteria; p__Firmicutes; c__Clostridia; o__Clostridiales; f__Ruminococcaceae; g__Oscillospira; s__	Bacteria	Firmicutes	Clostridia	Clostridiales	Ruminococcaceae	Oscillospira	Oscillospira sp.
191988	1.10779	0.292563	0.53139	1	7.72	20		k__Bacteria; p__Firmicutes; c__Clostridia; o__Clostridiales; f__Lachnospiraceae; g__; s__	Bacteria	Firmicutes	Clostridia	Clostridiales	Lachnospiraceae	Unclassified Lachnospiraceae	Unclassified Lachnospiraceae
4367729	1.09341	0.295717	0.533489	1	13.76	40.6667		k__Bacteria; p__Proteobacteria; c__Gammaproteobacteria; o__Pasteurellales; f__Pasteurellaceae; g__Haemophilus; s__parainfluenzae	Bacteria	Proteobacteria	Gammaproteobacteria	Pasteurellales	Pasteurellaceae	Haemophilus	parainfluenzae
178773	1.05783	0.303712	0.544235	1	8.44	1.88889		k__Bacteria; p__Firmicutes; c__Clostridia; o__Clostridiales; f__Ruminococcaceae; g__; s__	Bacteria	Firmicutes	Clostridia	Clostridiales	Ruminococcaceae	Unclassified Ruminococcaceae	Unclassified Ruminococcaceae
288609	1.04761	0.306057	0.544782	1	3.4	0.666667		k__Bacteria; p__Firmicutes; c__Clostridia; o__Clostridiales; f__Ruminococcaceae; g__; s__	Bacteria	Firmicutes	Clostridia	Clostridiales	Ruminococcaceae	Unclassified Ruminococcaceae	Unclassified Ruminococcaceae
291048	1.03104	0.309914	0.547994	1	41.32	28.7778		k__Bacteria; p__Firmicutes; c__Clostridia; o__Clostridiales; f__Lachnospiraceae; g__Dorea; s__	Bacteria	Firmicutes	Clostridia	Clostridiales	Lachnospiraceae	Dorea	Dorea sp.
331803	1.0204	0.312424	0.548797	1	1.72	3.77778		k__Bacteria; p__Firmicutes; c__Clostridia; o__Clostridiales; f__Lachnospiraceae; g__[Ruminococcus]; s__gnavus	Bacteria	Firmicutes	Clostridia	Clostridiales	Lachnospiraceae	Ruminococcus	gnavus
267030	0.99116	0.319459	0.554872	1	145.32	241.222		k__Bacteria; p__Firmicutes; c__Clostridia; o__Clostridiales; f__Lachnospiraceae; g__Blautia; s__	Bacteria	Firmicutes	Clostridia	Clostridiales	Lachnospiraceae	Blautia	Blautia sp.
194297	0.988788	0.320039	0.554872	1	2.44	3.11111		k__Bacteria; p__Firmicutes; c__Clostridia; o__Clostridiales; f__Ruminococcaceae; g__Ruminococcus; s__	Bacteria	Firmicutes	Clostridia	Clostridiales	Ruminococcaceae	Ruminococcus	Ruminococcus sp.
526780	0.970258	0.324616	0.559177	1	5.84	3.88889		k__Bacteria; p__Firmicutes; c__Clostridia; o__Clostridiales; f__Lachnospiraceae; g__; s__	Bacteria	Firmicutes	Clostridia	Clostridiales	Lachnospiraceae	Unclassified Lachnospiraceae	Unclassified Lachnospiraceae
33339	0.934333	0.33374	0.56063	1	44.08	0.444444		k__Bacteria; p__Firmicutes; c__Erysipelotrichi; o__Erysipelotrichales; f__Erysipelotrichaceae; g__Catenibacterium; s__	Bacteria	Firmicutes	Erysipelotrichi	Erysipelotrichales	Erysipelotrichaceae	Catenibacterium	Catenibacterium sp.
307339	0.927482	0.335518	0.56063	1	6.76	0.666667		k__Bacteria; p__Firmicutes; c__Clostridia; o__Clostridiales; f__Lachnospiraceae; g__Lachnospira; s__	Bacteria	Firmicutes	Clostridia	Clostridiales	Lachnospiraceae	Lachnospira	Lachnospira sp.
4324981	0.934905	0.333592	0.56063	1	2.16	1.22222		k__Bacteria; p__Firmicutes; c__Clostridia; o__Clostridiales; f__; g__; s__	Bacteria	Firmicutes	Clostridia	Clostridiales	Unclassified Clostridiales	Unclassified Clostridiales	Unclassified Clostridiales
4371338	0.925795	0.335958	0.56063	1	6.72	5.44444		k__Bacteria; p__Bacteroidetes; c__Bacteroidia; o__Bacteroidales; f__Rikenellaceae; g__; s__	Bacteria	Bacteroidetes	Bacteroidia	Bacteroidales	Rikenellaceae	Unclassified Rikenellaceae	Unclassified Rikenellaceae
4315498	0.934333	0.33374	0.56063	1	3.32	0.222222		k__Bacteria; p__Firmicutes; c__Clostridia; o__Clostridiales; f__Ruminococcaceae; g__; s__	Bacteria	Firmicutes	Clostridia	Clostridiales	Ruminococcaceae	Unclassified Ruminococcaceae	Unclassified Ruminococcaceae
102278	0.87176	0.350468	0.581212	1	4.96	1.44444		k__Bacteria; p__Firmicutes; c__Clostridia; o__Clostridiales; f__[Mogibacteriaceae]; g__; s__	Bacteria	Firmicutes	Clostridia	Clostridiales	Mogibacteriaceae	Unclassified Mogibacteriaceae	Unclassified Mogibacteriaceae
192231	0.827072	0.363121	0.591178	1	36.04	107.778		k__Bacteria; p__Firmicutes; c__Clostridia; o__Clostridiales; f__Ruminococcaceae; g__Faecalibacterium; s__prausnitzii	Bacteria	Firmicutes	Clostridia	Clostridiales	Ruminococcaceae	Faecalibacterium	prausnitzii
4345476	0.830603	0.362098	0.591178	1	49	0.777778		k__Bacteria; p__Bacteroidetes; c__Bacteroidia; o__Bacteroidales; f__; g__; s__	Bacteria	Bacteroidetes	Bacteroidia	Bacteroidales	Unclassified Bacteroidales	Unclassified Bacteroidales	Unclassified Bacteroidales
4318226	0.830603	0.362098	0.591178	1	6.72	0.444444		k__Bacteria; p__Firmicutes; c__Clostridia; o__Clostridiales; f__Ruminococcaceae; g__; s__	Bacteria	Firmicutes	Clostridia	Clostridiales	Ruminococcaceae	Unclassified Ruminococcaceae	Unclassified Ruminococcaceae
198649	0.781265	0.376755	0.605985	1	6.56	0.888889		k__Bacteria; p__Firmicutes; c__Clostridia; o__Clostridiales; f__Ruminococcaceae; g__; s__	Bacteria	Firmicutes	Clostridia	Clostridiales	Ruminococcaceae	Unclassified Ruminococcaceae	Unclassified Ruminococcaceae
4329575	0.781265	0.376755	0.605985	1	2.28	0.222222		k__Bacteria; p__Lentisphaerae; c__[Lentisphaeria]; o__Victivallales; f__Victivallaceae; g__; s__	Bacteria	Lentisphaerae	[Lentisphaeria]	Victivallales	Victivallaceae	Unclassified Victivallaceae	Unclassified Victivallaceae
327171	0.771664	0.379703	0.60707	1	115.36	161		k__Bacteria; p__Firmicutes; c__Clostridia; o__Clostridiales; f__Lachnospiraceae; g__; s__	Bacteria	Firmicutes	Clostridia	Clostridiales	Lachnospiraceae	Unclassified Lachnospiraceae	Unclassified Lachnospiraceae
4394244	0.750066	0.386455	0.614188	1	11.72	5		k__Bacteria; p__Firmicutes; c__Clostridia; o__Clostridiales; f__; g__; s__	Bacteria	Firmicutes	Clostridia	Clostridiales	Unclassified Clostridiales	Unclassified Clostridiales	Unclassified Clostridiales
191792	0.738765	0.390057	0.616243	1	36.64	85.7778		k__Bacteria; p__Firmicutes; c__Clostridia; o__Clostridiales; f__Ruminococcaceae; g__; s__	Bacteria	Firmicutes	Clostridia	Clostridiales	Ruminococcaceae	Unclassified Ruminococcaceae	Unclassified Ruminococcaceae
358041	0.719683	0.396248	0.622342	1	9.04	1.77778		k__Bacteria; p__Firmicutes; c__Clostridia; o__Clostridiales; f__Lachnospiraceae; g__Blautia; s__producta	Bacteria	Firmicutes	Clostridia	Clostridiales	Lachnospiraceae	Blautia	producta
131786	0.689357	0.406383	0.634528	1	12.24	5.22222		k__Bacteria; p__Firmicutes; c__Clostridia; o__Clostridiales; f__Clostridiaceae; g__Clostridium; s__	Bacteria	Firmicutes	Clostridia	Clostridiales	Clostridiaceae	Clostridium	Clostridium sp.
191229	0.680737	0.409333	0.635418	1	126.32	162.556		k__Bacteria; p__Firmicutes; c__Clostridia; o__Clostridiales; f__Ruminococcaceae; g__Faecalibacterium; s__prausnitzii	Bacteria	Firmicutes	Clostridia	Clostridiales	Ruminococcaceae	Faecalibacterium	prausnitzii
4339144	0.661904	0.415888	0.638174	1	3.28	6.77778		k__Bacteria; p__Bacteroidetes; c__Bacteroidia; o__Bacteroidales; f__[Odoribacteraceae]; g__Butyricimonas; s__	Bacteria	Bacteroidetes	Bacteroidia	Bacteroidales	Odoribacteraceae	Butyricimonas	Butyricimonas sp.
323818	0.661904	0.415888	0.638174	1	4.16	9.11111		k__Bacteria; p__Firmicutes; c__Clostridia; o__Clostridiales; f__; g__; s__	Bacteria	Firmicutes	Clostridia	Clostridiales	Unclassified Clostridiales	Unclassified Clostridiales	Unclassified Clostridiales
183798	0.646609	0.421328	0.642391	1	91.2	204		k__Bacteria; p__Proteobacteria; c__Betaproteobacteria; o__Burkholderiales; f__Alcaligenaceae; g__Sutterella; s__	Bacteria	Proteobacteria	Betaproteobacteria	Burkholderiales	Alcaligenaceae	Sutterella	Sutterella sp.
523823	0.640724	0.423449	0.642391	1	2.72	1.55556		k__Bacteria; p__Firmicutes; c__Clostridia; o__Clostridiales; f__Lachnospiraceae; g__; s__	Bacteria	Firmicutes	Clostridia	Clostridiales	Lachnospiraceae	Unclassified Lachnospiraceae	Unclassified Lachnospiraceae
2442706	0.612968	0.433672	0.654184	1	0.28	0.666667		k__Bacteria; p__Firmicutes; c__Clostridia; o__Clostridiales; f__Christensenellaceae; g__; s__	Bacteria	Firmicutes	Clostridia	Clostridiales	Christensenellaceae	Unclassified Christensenellaceae	Unclassified Christensenellaceae
181862	0.56911	0.450613	0.666929	1	1.48	3.55556		k__Bacteria; p__Firmicutes; c__Clostridia; o__Clostridiales; f__Ruminococcaceae; g__Oscillospira; s__	Bacteria	Firmicutes	Clostridia	Clostridiales	Ruminococcaceae	Oscillospira	Oscillospira sp.
4482516	0.556193	0.455798	0.666929	1	13.28	6		k__Bacteria; p__Firmicutes; c__Clostridia; o__Clostridiales; f__Clostridiaceae; g__; s__	Bacteria	Firmicutes	Clostridia	Clostridiales	Clostridiaceae	Unclassified Clostridiaceae	Unclassified Clostridiaceae
291424	0.550529	0.458102	0.666929	1	1.24	3.11111		k__Bacteria; p__Firmicutes; c__Clostridia; o__Clostridiales; f__; g__; s__	Bacteria	Firmicutes	Clostridia	Clostridiales	Unclassified Clostridiales	Unclassified Clostridiales	Unclassified Clostridiales
352902	0.543157	0.461127	0.666929	1	5.92	4.77778		k__Bacteria; p__Firmicutes; c__Clostridia; o__Clostridiales; f__; g__; s__	Bacteria	Firmicutes	Clostridia	Clostridiales	Unclassified Clostridiales	Unclassified Clostridiales	Unclassified Clostridiales
4441081	0.56983	0.450326	0.666929	1	2.56	1.88889		k__Bacteria; p__Actinobacteria; c__Coriobacteriia; o__Coriobacteriales; f__Coriobacteriaceae; g__; s__	Bacteria	Actinobacteria	Coriobacteriia	Coriobacteriales	Coriobacteriaceae	Unclassified Coriobacteriaceae	Unclassified Coriobacteriaceae
319374	0.540632	0.462171	0.666929	1	3.76	5.44444		k__Bacteria; p__Firmicutes; c__Clostridia; o__Clostridiales; f__Lachnospiraceae; g__; s__	Bacteria	Firmicutes	Clostridia	Clostridiales	Lachnospiraceae	Unclassified Lachnospiraceae	Unclassified Lachnospiraceae
364261	0.554749	0.456384	0.666929	1	7.2	3.55556		k__Bacteria; p__Firmicutes; c__Clostridia; o__Clostridiales; f__Lachnospiraceae; g__; s__	Bacteria	Firmicutes	Clostridia	Clostridiales	Lachnospiraceae	Unclassified Lachnospiraceae	Unclassified Lachnospiraceae
258099	0.534785	0.464602	0.666929	1	0.32	0.777778		k__Bacteria; p__Firmicutes; c__Clostridia; o__Clostridiales; f__Ruminococcaceae; g__; s__	Bacteria	Firmicutes	Clostridia	Clostridiales	Ruminococcaceae	Unclassified Ruminococcaceae	Unclassified Ruminococcaceae
296941	0.556023	0.455867	0.666929	1	2.12	1.55556		k__Bacteria; p__Firmicutes; c__Clostridia; o__Clostridiales; f__Ruminococcaceae; g__; s__	Bacteria	Firmicutes	Clostridia	Clostridiales	Ruminococcaceae	Unclassified Ruminococcaceae	Unclassified Ruminococcaceae
188124	0.520859	0.470475	0.670637	1	10.36	5.88889		k__Bacteria; p__Bacteroidetes; c__Bacteroidia; o__Bacteroidales; f__[Odoribacteraceae]; g__Butyricimonas; s__	Bacteria	Bacteroidetes	Bacteroidia	Bacteroidales	Odoribacteraceae	Butyricimonas	Butyricimonas sp.
290943	0.510968	0.47472	0.670637	1	26.4	30.5556		k__Bacteria; p__Firmicutes; c__Clostridia; o__Clostridiales; f__Lachnospiraceae; g__Coprococcus; s__	Bacteria	Firmicutes	Clostridia	Clostridiales	Lachnospiraceae	Coprococcus	Coprococcus sp.
192735	0.516073	0.472522	0.670637	1	0.68	0.444444		k__Bacteria; p__Firmicutes; c__Clostridia; o__Clostridiales; f__; g__; s__	Bacteria	Firmicutes	Clostridia	Clostridiales	Unclassified Clostridiales	Unclassified Clostridiales	Unclassified Clostridiales
4468391	0.502357	0.478466	0.672371	1	62.56	142.444		k__Bacteria; p__Firmicutes; c__Clostridia; o__Clostridiales; f__Ruminococcaceae; g__Ruminococcus; s__bromii	Bacteria	Firmicutes	Clostridia	Clostridiales	Ruminococcaceae	Ruminococcus	bromii
191858	0.481747	0.487632	0.681664	1	34.96	32.8889		k__Bacteria; p__Firmicutes; c__Clostridia; o__Clostridiales; f__Ruminococcaceae; g__Faecalibacterium; s__prausnitzii	Bacteria	Firmicutes	Clostridia	Clostridiales	Ruminococcaceae	Faecalibacterium	prausnitzii
4481613	0.467309	0.494228	0.683724	1	31.28	21.1111		k__Bacteria; p__Actinobacteria; c__Coriobacteriia; o__Coriobacteriales; f__Coriobacteriaceae; g__Collinsella; s__aerofaciens	Bacteria	Actinobacteria	Coriobacteriia	Coriobacteriales	Coriobacteriaceae	Collinsella	aerofaciens
4476449	0.470243	0.492875	0.683724	1	3.4	8.77778		k__Bacteria; p__Firmicutes; c__Clostridia; o__Clostridiales; f__Ruminococcaceae	Bacteria	Firmicutes	Clostridia	Clostridiales	Ruminococcaceae	Unclassified Ruminococcaceae	Unclassified Ruminococcaceae
358112	0.459991	0.497628	0.68488	1	7.28	6.33333		k__Bacteria; p__Firmicutes; c__Clostridia; o__Clostridiales; f__Lachnospiraceae	Bacteria	Firmicutes	Clostridia	Clostridiales	Lachnospiraceae	Unclassified Lachnospiraceae	Unclassified Lachnospiraceae
312586	0.428689	0.512633	0.698332	1	1.64	3.22222		k__Bacteria; p__Firmicutes; c__Clostridia; o__Clostridiales; f__Lachnospiraceae; g__; s__	Bacteria	Firmicutes	Clostridia	Clostridiales	Lachnospiraceae	Unclassified Lachnospiraceae	Unclassified Lachnospiraceae
4477775	0.429793	0.512091	0.698332	1	103.32	7.44444		k__Bacteria; p__Firmicutes; c__Clostridia; o__Clostridiales; f__Peptostreptococcaceae; g__; s__	Bacteria	Firmicutes	Clostridia	Clostridiales	Peptostreptococcaceae	Unclassified Peptostreptococcaceae	Unclassified Peptostreptococcaceae
307127	0.416576	0.518651	0.702943	1	19	24.3333		k__Bacteria; p__Firmicutes; c__Clostridia; o__Clostridiales; f__Lachnospiraceae; g__Lachnospira; s__	Bacteria	Firmicutes	Clostridia	Clostridiales	Lachnospiraceae	Lachnospira	Lachnospira sp.
319052	0.403603	0.525235	0.708271	1	2.52	6.66667		k__Bacteria; p__Firmicutes; c__Clostridia; o__Clostridiales; f__Ruminococcaceae; g__; s__	Bacteria	Firmicutes	Clostridia	Clostridiales	Ruminococcaceae	Unclassified Ruminococcaceae	Unclassified Ruminococcaceae
289559	0.395015	0.529675	0.71067	1	3.12	6.33333		k__Bacteria; p__Firmicutes; c__Clostridia; o__Clostridiales; f__Ruminococcaceae; g__; s__	Bacteria	Firmicutes	Clostridia	Clostridiales	Ruminococcaceae	Unclassified Ruminococcaceae	Unclassified Ruminococcaceae
262514	0.366824	0.544741	0.726601	1	49.32	71.7778		k__Bacteria; p__Firmicutes; c__Clostridia; o__Clostridiales; f__; g__; s__	Bacteria	Firmicutes	Clostridia	Clostridiales	Unclassified Clostridiales	Unclassified Clostridiales	Unclassified Clostridiales
290784	0.362734	0.546992	0.726601	1	2.28	1.22222		k__Bacteria; p__Firmicutes; c__Clostridia; o__Clostridiales; f__Lachnospiraceae; g__; s__	Bacteria	Firmicutes	Clostridia	Clostridiales	Lachnospiraceae	Unclassified Lachnospiraceae	Unclassified Lachnospiraceae
289357	0.342962	0.558125	0.734085	1	266.48	307.333		k__Bacteria; p__Firmicutes; c__Clostridia; o__Clostridiales; f__; g__; s__	Bacteria	Firmicutes	Clostridia	Clostridiales	Unclassified Clostridiales	Unclassified Clostridiales	Unclassified Clostridiales
194651	0.344993	0.556961	0.734085	1	2.44	2.77778		k__Bacteria; p__Firmicutes; c__Clostridia; o__Clostridiales; f__Ruminococcaceae; g__; s__	Bacteria	Firmicutes	Clostridia	Clostridiales	Ruminococcaceae	Unclassified Ruminococcaceae	Unclassified Ruminococcaceae
4453255	0.284415	0.593822	0.773417	1	1.44	8.55556		k__Bacteria; p__Firmicutes; c__Bacilli; o__Turicibacterales; f__Turicibacteraceae; g__Turicibacter; s__	Bacteria	Firmicutes	Bacilli	Turicibacterales	Turicibacteraceae	Turicibacter	Turicibacter sp.
331902	0.287922	0.591555	0.773417	1	9.84	10.2222		k__Bacteria; p__Firmicutes; c__Clostridia; o__Clostridiales; f__; g__; s__	Bacteria	Firmicutes	Clostridia	Clostridiales	Unclassified Clostridiales	Unclassified Clostridiales	Unclassified Clostridiales
175018	0.278722	0.59754	0.774481	1	44.92	65.3333		k__Bacteria; p__Firmicutes; c__Clostridia; o__Clostridiales; f__Ruminococcaceae; g__Ruminococcus; s__	Bacteria	Firmicutes	Clostridia	Clostridiales	Ruminococcaceae	Ruminococcus	Ruminococcus sp.
4403151	0.259147	0.610707	0.787723	1	25.4	25.3333		k__Bacteria; p__Firmicutes; c__Clostridia; o__Clostridiales; f__Ruminococcaceae; g__Ruminococcus; s__	Bacteria	Firmicutes	Clostridia	Clostridiales	Ruminococcaceae	Ruminococcus	Ruminococcus sp.
319153	0.219682	0.639282	0.801353	1	2.36	2.66667		k__Bacteria; p__Firmicutes; c__Clostridia; o__Clostridiales; f__Lachnospiraceae; g__Coprococcus; s__	Bacteria	Firmicutes	Clostridia	Clostridiales	Lachnospiraceae	Coprococcus	Coprococcus sp.
4468466	0.236715	0.626589	0.801353	1	6.24	3.88889		k__Bacteria; p__Firmicutes; c__Clostridia; o__Clostridiales; f__Ruminococcaceae; g__Oscillospira; s__	Bacteria	Firmicutes	Clostridia	Clostridiales	Ruminococcaceae	Oscillospira	Oscillospira sp.
4484047	0.220309	0.638805	0.801353	1	4.04	2.11111		k__Bacteria; p__Firmicutes; c__Bacilli; o__Lactobacillales; f__Streptococcaceae; g__Streptococcus; s__	Bacteria	Firmicutes	Bacilli	Lactobacillales	Streptococcaceae	Streptococcus	Streptococcus sp.
4396246	0.220971	0.638301	0.801353	1	5.92	2.88889		k__Bacteria; p__Bacteroidetes; c__Bacteroidia; o__Bacteroidales; f__Rikenellaceae; g__; s__	Bacteria	Bacteroidetes	Bacteroidia	Bacteroidales	Rikenellaceae	Unclassified Rikenellaceae	Unclassified Rikenellaceae
267703	0.220698	0.638509	0.801353	1	11.56	4.11111		k__Bacteria; p__Firmicutes; c__Clostridia; o__Clostridiales; f__Ruminococcaceae; g__; s__	Bacteria	Firmicutes	Clostridia	Clostridiales	Ruminococcaceae	Unclassified Ruminococcaceae	Unclassified Ruminococcaceae
368587	0.228161	0.632891	0.801353	1	12.92	4.77778		k__Bacteria; p__Firmicutes; c__Clostridia; o__Clostridiales; f__Ruminococcaceae; g__; s__	Bacteria	Firmicutes	Clostridia	Clostridiales	Ruminococcaceae	Unclassified Ruminococcaceae	Unclassified Ruminococcaceae
4477861	0.171612	0.678683	0.84283	1	0.72	7.33333		k__Bacteria; p__Bacteroidetes; c__Bacteroidia; o__Bacteroidales; f__Bacteroidaceae; g__Bacteroides; s__	Bacteria	Bacteroidetes	Bacteroidia	Bacteroidales	Bacteroidaceae	Bacteroides	Bacteroides sp.
4430843	0.171612	0.678683	0.84283	1	1.84	274.889		k__Bacteria; p__Bacteroidetes; c__Bacteroidia; o__Bacteroidales; f__Prevotellaceae; g__Prevotella; s__	Bacteria	Bacteroidetes	Bacteroidia	Bacteroidales	Prevotellaceae	Prevotella	Prevotella sp.
176062	0.161439	0.687835	0.850241	1	6	4.44444		k__Bacteria; p__Firmicutes; c__Clostridia; o__Clostridiales; f__; g__; s__	Bacteria	Firmicutes	Clostridia	Clostridiales	Unclassified Clostridiales	Unclassified Clostridiales	Unclassified Clostridiales
1133760	0.150399	0.698154	0.852822	1	3.24	3.11111		k__Bacteria; p__Bacteroidetes; c__Bacteroidia; o__Bacteroidales; f__[Odoribacteraceae]; g__Butyricimonas; s__	Bacteria	Bacteroidetes	Bacteroidia	Bacteroidales	Odoribacteraceae	Butyricimonas	Butyricimonas sp.
310886	0.132868	0.715476	0.852822	1	4.48	9.22222		k__Bacteria; p__Firmicutes; c__Clostridia; o__Clostridiales; f__Ruminococcaceae; g__Oscillospira; s__	Bacteria	Firmicutes	Clostridia	Clostridiales	Ruminococcaceae	Oscillospira	Oscillospira sp.
265375	0.150937	0.697642	0.852822	1	4.12	12.4444		k__Bacteria; p__Bacteroidetes; c__Bacteroidia; o__Bacteroidales; f__[Paraprevotellaceae]; g__Paraprevotella; s__	Bacteria	Bacteroidetes	Bacteroidia	Bacteroidales	Paraprevotellaceae	Paraprevotella	Paraprevotella sp.
261698	0.135023	0.71328	0.852822	1	21.8	25.1111		k__Bacteria; p__Firmicutes; c__Clostridia; o__Clostridiales	Bacteria	Firmicutes	Clostridia	Clostridiales	Unclassified Clostridiales	Unclassified Clostridiales	Unclassified Clostridiales
569681	0.141654	0.706642	0.852822	1	0.92	1.66667		k__Bacteria; p__Firmicutes; c__Clostridia; o__Clostridiales; f__; g__; s__	Bacteria	Firmicutes	Clostridia	Clostridiales	Unclassified Clostridiales	Unclassified Clostridiales	Unclassified Clostridiales
301094	0.138279	0.709998	0.852822	1	4.88	4.11111		k__Bacteria; p__Firmicutes; c__Clostridia; o__Clostridiales; f__Lachnospiraceae; g__; s__	Bacteria	Firmicutes	Clostridia	Clostridiales	Lachnospiraceae	Unclassified Lachnospiraceae	Unclassified Lachnospiraceae
306499	0.140223	0.708059	0.852822	1	30.32	24		k__Bacteria; p__Firmicutes; c__Clostridia; o__Clostridiales; f__Lachnospiraceae; g__; s__	Bacteria	Firmicutes	Clostridia	Clostridiales	Lachnospiraceae	Unclassified Lachnospiraceae	Unclassified Lachnospiraceae
211191	0.143999	0.704337	0.852822	1	13.68	5.88889		k__Bacteria; p__Firmicutes; c__Clostridia; o__Clostridiales; f__Ruminococcaceae; g__; s__	Bacteria	Firmicutes	Clostridia	Clostridiales	Ruminococcaceae	Unclassified Ruminococcaceae	Unclassified Ruminococcaceae
192244	0.0979228	0.754337	0.895146	1	39.84	34.7778		k__Bacteria; p__Firmicutes; c__Clostridia; o__Clostridiales; f__Ruminococcaceae; g__; s__	Bacteria	Firmicutes	Clostridia	Clostridiales	Ruminococcaceae	Unclassified Ruminococcaceae	Unclassified Ruminococcaceae
796473	0.0923174	0.761251	0.898403	1	2.52	7.55556		k__Bacteria; p__Bacteroidetes; c__Bacteroidia; o__Bacteroidales; f__Prevotellaceae; g__Prevotella; s__	Bacteria	Bacteroidetes	Bacteroidia	Bacteroidales	Prevotellaceae	Prevotella	Prevotella sp.
191441	0.0876737	0.767156	0.898403	1	56.88	19		k__Bacteria; p__Firmicutes; c__Clostridia; o__Clostridiales; f__Ruminococcaceae; g__Ruminococcus; s__	Bacteria	Firmicutes	Clostridia	Clostridiales	Ruminococcaceae	Ruminococcus	Ruminococcus sp.
147865	0.087658	0.767176	0.898403	1	19	41.5556		k__Bacteria; p__Firmicutes; c__Clostridia; o__Clostridiales; f__; g__; s__	Bacteria	Firmicutes	Clostridia	Clostridiales	Unclassified Clostridiales	Unclassified Clostridiales	Unclassified Clostridiales
358507	0.0602904	0.806037	0.923621	1	24.32	14.2222		k__Bacteria; p__Firmicutes; c__Clostridia; o__Clostridiales; f__Lachnospiraceae; g__Lachnobacterium; s__	Bacteria	Firmicutes	Clostridia	Clostridiales	Lachnospiraceae	Lachnobacterium	Lachnobacterium sp.
470690	0.0478108	0.826917	0.923621	1	11.36	26.2222		k__Archaea; p__Euryarchaeota; c__Methanobacteria; o__Methanobacteriales; f__Methanobacteriaceae; g__Methanobrevibacter; s__	Archaea	Euryarchaeota	Methanobacteria	Methanobacteriales	Methanobacteriaceae	Methanobrevibacter	Methanobrevibacter sp.
470759	0.0689147	0.792924	0.923621	1	1.6	1		k__Bacteria; p__Proteobacteria; c__Betaproteobacteria; o__Burkholderiales; f__Oxalobacteraceae; g__Oxalobacter; s__formigenes	Bacteria	Proteobacteria	Betaproteobacteria	Burkholderiales	Oxalobacteraceae	Oxalobacter	formigenes
4459159	0.064381	0.799701	0.923621	1	1021.88	1399.89		k__Bacteria; p__Bacteroidetes; c__Bacteroidia; o__Bacteroidales; f__Prevotellaceae; g__Prevotella; s__copri	Bacteria	Bacteroidetes	Bacteroidia	Bacteroidales	Prevotellaceae	Prevotella	copri
192419	0.0514572	0.820547	0.923621	1	30.04	33.2222		k__Bacteria; p__Firmicutes; c__Clostridia; o__Clostridiales; f__Ruminococcaceae; g__Ruminococcus; s__callidus	Bacteria	Firmicutes	Clostridia	Clostridiales	Ruminococcaceae	Ruminococcus	callidus
148354	0.0440932	0.83368	0.923621	1	4.72	0.777778		k__Bacteria; p__Firmicutes; c__Clostridia; o__Clostridiales; f__Christensenellaceae; g__; s__	Bacteria	Firmicutes	Clostridia	Clostridiales	Christensenellaceae	Unclassified Christensenellaceae	Unclassified Christensenellaceae
197233	0.0525023	0.818765	0.923621	1	1	0.777778		k__Bacteria; p__Firmicutes; c__Clostridia; o__Clostridiales; f__; g__; s__	Bacteria	Firmicutes	Clostridia	Clostridiales	Unclassified Clostridiales	Unclassified Clostridiales	Unclassified Clostridiales
296909	0.0442154	0.833453	0.923621	1	0.6	0.444444		k__Bacteria; p__Firmicutes; c__Clostridia; o__Clostridiales; f__; g__; s__	Bacteria	Firmicutes	Clostridia	Clostridiales	Unclassified Clostridiales	Unclassified Clostridiales	Unclassified Clostridiales
307198	0.0541154	0.816051	0.923621	1	16.12	14.5556		k__Bacteria; p__Firmicutes; c__Clostridia; o__Clostridiales; f__Lachnospiraceae; g__; s__	Bacteria	Firmicutes	Clostridia	Clostridiales	Lachnospiraceae	Unclassified Lachnospiraceae	Unclassified Lachnospiraceae
43267	0.0441054	0.833658	0.923621	1	2.2	1.11111		k__Bacteria; p__Firmicutes; c__Clostridia; o__Clostridiales; f__[Mogibacteriaceae]; g__; s__	Bacteria	Firmicutes	Clostridia	Clostridiales	Mogibacteriaceae	Unclassified Mogibacteriaceae	Unclassified Mogibacteriaceae
278758	0.048829	0.825113	0.923621	1	2.08	2.55556		k__Bacteria; p__Firmicutes; c__Clostridia; o__Clostridiales; f__Ruminococcaceae; g__; s__	Bacteria	Firmicutes	Clostridia	Clostridiales	Ruminococcaceae	Unclassified Ruminococcaceae	Unclassified Ruminococcaceae
4364405	0.0600401	0.806433	0.923621	1	19.96	14.6667		k__Bacteria; p__Firmicutes; c__Clostridia; o__Clostridiales; f__Ruminococcaceae; g__; s__	Bacteria	Firmicutes	Clostridia	Clostridiales	Ruminococcaceae	Unclassified Ruminococcaceae	Unclassified Ruminococcaceae
4465124	0.0667611	0.796112	0.923621	1	16.08	2.66667		k__Bacteria; p__Firmicutes; c__Clostridia; o__Clostridiales; f__Ruminococcaceae; g__; s__	Bacteria	Firmicutes	Clostridia	Clostridiales	Ruminococcaceae	Unclassified Ruminococcaceae	Unclassified Ruminococcaceae
305345	0.0308949	0.860475	0.949367	1	53.24	46.6667		k__Bacteria; p__Firmicutes; c__Clostridia; o__Clostridiales; f__Lachnospiraceae; g__; s__	Bacteria	Firmicutes	Clostridia	Clostridiales	Lachnospiraceae	Unclassified Lachnospiraceae	Unclassified Lachnospiraceae
4319875	0.0275	0.86829	0.949562	1	0.48	0.666667		k__Bacteria; p__Actinobacteria; c__Actinobacteria; o__Actinomycetales; f__Actinomycetaceae; g__Actinomyces; s__	Bacteria	Actinobacteria	Actinobacteria	Actinomycetales	Actinomycetaceae	Actinomyces	Actinomyces sp.
4474933	0.0255236	0.873069	0.949562	1	9.96	30.4444		k__Bacteria; p__Bacteroidetes; c__Bacteroidia; o__Bacteroidales; f__Bacteroidaceae; g__Bacteroides; s__	Bacteria	Bacteroidetes	Bacteroidia	Bacteroidales	Bacteroidaceae	Bacteroides	Bacteroides sp.
847711	0.0247956	0.874878	0.949562	1	2.32	1.44444		k__Bacteria; p__Firmicutes; c__Clostridia; o__Clostridiales; f__Christensenellaceae; g__; s__	Bacteria	Firmicutes	Clostridia	Clostridiales	Christensenellaceae	Unclassified Christensenellaceae	Unclassified Christensenellaceae
191461	0.0270534	0.869354	0.949562	1	1.64	1.22222		k__Bacteria; p__Firmicutes; c__Clostridia; o__Clostridiales; f__Ruminococcaceae; g__; s__	Bacteria	Firmicutes	Clostridia	Clostridiales	Ruminococcaceae	Unclassified Ruminococcaceae	Unclassified Ruminococcaceae
359800	0.0158006	0.899969	0.960704	1	10.8	52.7778		k__Bacteria; p__Firmicutes; c__Clostridia; o__Clostridiales; f__Lachnospiraceae; g__Coprococcus; s__	Bacteria	Firmicutes	Clostridia	Clostridiales	Lachnospiraceae	Coprococcus	Coprococcus sp.
261912	0.0137269	0.906732	0.960704	1	30.88	25.5556		k__Bacteria; p__Firmicutes; c__Clostridia; o__Clostridiales; f__Lachnospiraceae; g__Dorea; s__	Bacteria	Firmicutes	Clostridia	Clostridiales	Lachnospiraceae	Dorea	Dorea sp.
198911	0.013899	0.906151	0.960704	1	44.92	29.7778		k__Bacteria; p__Firmicutes; c__Clostridia; o__Clostridiales; f__Ruminococcaceae; g__Faecalibacterium; s__prausnitzii	Bacteria	Firmicutes	Clostridia	Clostridiales	Ruminococcaceae	Faecalibacterium	prausnitzii
851804	0.0172334	0.895557	0.960704	1	1.28	1		k__Bacteria; p__Firmicutes; c__Clostridia; o__Clostridiales; f__Ruminococcaceae; g__Ruminococcus; s__	Bacteria	Firmicutes	Clostridia	Clostridiales	Ruminococcaceae	Ruminococcus	Ruminococcus sp.
4454492	0.0140272	0.905722	0.960704	1	13.12	13.1111		k__Bacteria; p__Firmicutes; c__Bacilli; o__Lactobacillales; f__Streptococcaceae; g__Streptococcus; s__	Bacteria	Firmicutes	Bacilli	Lactobacillales	Streptococcaceae	Streptococcus	Streptococcus sp.
300835	0.0137311	0.906718	0.960704	1	28.84	32.8889		k__Bacteria; p__Firmicutes; c__Clostridia; o__Clostridiales; f__Lachnospiraceae; g__; s__	Bacteria	Firmicutes	Clostridia	Clostridiales	Lachnospiraceae	Unclassified Lachnospiraceae	Unclassified Lachnospiraceae
4108205	0.0124542	0.911142	0.961561	1	16.32	30.3333		k__Bacteria; p__Bacteroidetes; c__Bacteroidia; o__Bacteroidales; f__[Paraprevotellaceae]; g__Paraprevotella; s__	Bacteria	Bacteroidetes	Bacteroidia	Bacteroidales	Paraprevotellaceae	Paraprevotella	Paraprevotella sp.
292758	0.0110355	0.916336	0.963235	1	1.32	0.666667		k__Bacteria; p__Firmicutes; c__Clostridia; o__Clostridiales; f__; g__; s__	Bacteria	Firmicutes	Clostridia	Clostridiales	Unclassified Clostridiales	Unclassified Clostridiales	Unclassified Clostridiales
277489	0.00612331	0.937628	0.972712	1	14.84	12.4444		k__Bacteria; p__Firmicutes; c__Clostridia; o__Clostridiales; f__Lachnospiraceae; g__Coprococcus; s__	Bacteria	Firmicutes	Clostridia	Clostridiales	Lachnospiraceae	Coprococcus	Coprococcus sp.
290630	0.00275506	0.958139	0.972712	1	6.48	9.33333		k__Bacteria; p__Firmicutes; c__Clostridia; o__Clostridiales; f__Ruminococcaceae; g__Faecalibacterium; s__prausnitzii	Bacteria	Firmicutes	Clostridia	Clostridiales	Ruminococcaceae	Faecalibacterium	prausnitzii
305016	0.00687079	0.933939	0.972712	1	2.52	2.11111		k__Bacteria; p__Firmicutes; c__Clostridia; o__Clostridiales; f__Lachnospiraceae; g__Lachnospira; s__	Bacteria	Firmicutes	Clostridia	Clostridiales	Lachnospiraceae	Lachnospira	Lachnospira sp.
4446521	0.00275659	0.958128	0.972712	1	0.68	1		k__Bacteria; p__Firmicutes; c__Bacilli; o__Lactobacillales; f__Streptococcaceae; g__Lactococcus; s__	Bacteria	Firmicutes	Bacilli	Lactobacillales	Streptococcaceae	Lactococcus	Lactococcus sp.
4381400	0.00275506	0.958139	0.972712	1	25.44	25.4444		k__Bacteria; p__Bacteroidetes; c__Bacteroidia; o__Bacteroidales; f__Prevotellaceae; g__Prevotella; s__stercorea	Bacteria	Bacteroidetes	Bacteroidia	Bacteroidales	Prevotellaceae	Prevotella	stercorea
333012	0.00275506	0.958139	0.972712	1	4.36	2.55556		k__Bacteria; p__Firmicutes; c__Clostridia; o__Clostridiales; f__Lachnospiraceae; g__[Ruminococcus]; s__	Bacteria	Firmicutes	Clostridia	Clostridiales	Lachnospiraceae	Ruminococcus	Ruminococcus sp.
1139021	0.00686448	0.933969	0.972712	1	8.56	1.88889		k__Bacteria; p__Firmicutes; c__Clostridia; o__Clostridiales; f__Christensenellaceae; g__; s__	Bacteria	Firmicutes	Clostridia	Clostridiales	Christensenellaceae	Unclassified Christensenellaceae	Unclassified Christensenellaceae
360928	0.0044889	0.946582	0.972712	1	4.84	4		k__Bacteria; p__Firmicutes; c__Clostridia; o__Clostridiales; f__; g__; s__	Bacteria	Firmicutes	Clostridia	Clostridiales	Unclassified Clostridiales	Unclassified Clostridiales	Unclassified Clostridiales
3218245	0.00305182	0.955945	0.972712	1	1.64	0.333333		k__Bacteria; p__Firmicutes; c__Clostridia; o__Clostridiales; f__Veillonellaceae; g__Veillonella; s__dispar	Bacteria	Firmicutes	Clostridia	Clostridiales	Veillonellaceae	Veillonella	dispar
1017892	0.000632826	0.979931	0.984408	1	3.76	211.556		k__Bacteria; p__Firmicutes; c__Clostridia; o__Clostridiales; f__[Tissierellaceae]; g__Finegoldia; s__	Bacteria	Firmicutes	Clostridia	Clostridiales	Tissierellaceae	Finegoldia	Finegoldia sp.
4301511	0.000381944	0.984408	0.984408	1	19	16.2222		k__Bacteria; p__Firmicutes; c__Clostridia; o__Clostridiales; f__; g__; s__	Bacteria	Firmicutes	Clostridia	Clostridiales	Unclassified Clostridiales	Unclassified Clostridiales	Unclassified Clostridiales
2295960	0.000447475	0.983123	0.984408	1	16.96	3.88889		k__Bacteria; p__Proteobacteria; c__Gammaproteobacteria; o__Enterobacteriales; f__Enterobacteriaceae; g__; s__	Bacteria	Proteobacteria	Gammaproteobacteria	Enterobacteriales	Enterobacteriaceae	Unclassified Enterobacteriaceae	Unclassified Enterobacteriaceae
19611	0.000588328	0.980649	0.984408	1	0.84	0.555556		k__Bacteria; p__Firmicutes; c__Clostridia; o__Clostridiales; f__Ruminococcaceae; g__; s__	Bacteria	Firmicutes	Clostridia	Clostridiales	Ruminococcaceae	Unclassified Ruminococcaceae	Unclassified Ruminococcaceae
